# Supplementary material for: Complete Genome Sequence of the Soybean Symbiont Bradyrhizobium japonicum Strain USDA6T
Source: Genes (Basel). 2011 Oct 28;2(4):763–87. doi: 10.3390/genes2040763 (PMC3927601; doi:10.3390/genes2040763)
Supplement: Supplementary File 1 — PDF-Document (PDF, 917 KB) [file genes-02-00763-s001.pdf]

|                                                                                   |                                                            |                                                                                   |                                                              |                                                                                     |                                                              |
|-----------------------------------------------------------------------------------|------------------------------------------------------------|-----------------------------------------------------------------------------------|--------------------------------------------------------------|-------------------------------------------------------------------------------------|--------------------------------------------------------------|
| 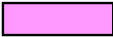 | Translation, ribosomal structure and biogenesis            | 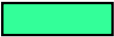 | Cell motility                                                | 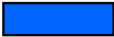 | Coenzyme transport and metabolism                            |
| 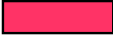 | Transcription                                              | 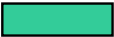 | Posttranslational modification, protein turnover, chaperones | 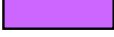 | Lipid transport and metabolism                               |
| 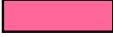 | Replication, recombination and repair                      | 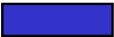 | Energy production and conversion                             | 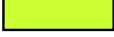 | Inorganic ion transport and metabolism                       |
| 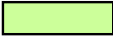 | Cell cycle control, cell division, chromosome partitioning | 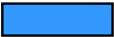 | Carbohydrate transport and metabolism                        | 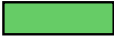 | Secondary metabolites biosynthesis, transport and catabolism |
| 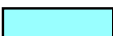 | Signal transduction mechanisms                             | 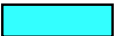 | Amino acid transport and metabolism                          | 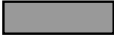 | General function prediction only                             |
| 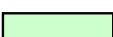 | Cell wall /membrane/envelope biogenesis                    | 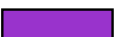 | Nucleotide transport and metabolism                          | 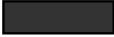 | Function unknown                                             |
|                                                                                   |                                                            |                                                                                   |                                                              | 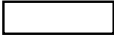 | Not in COGs                                                  |

**Supplemental Figure 1.** Color codes for functional categories of the predicted proteins. The bars showing the positions of the putative protein-encoding genes are arranged on two circular representations depicted in Figure 1. The bars are represented by 18 colors, based on Clusters of Orthologous Groups (COG) assignments.

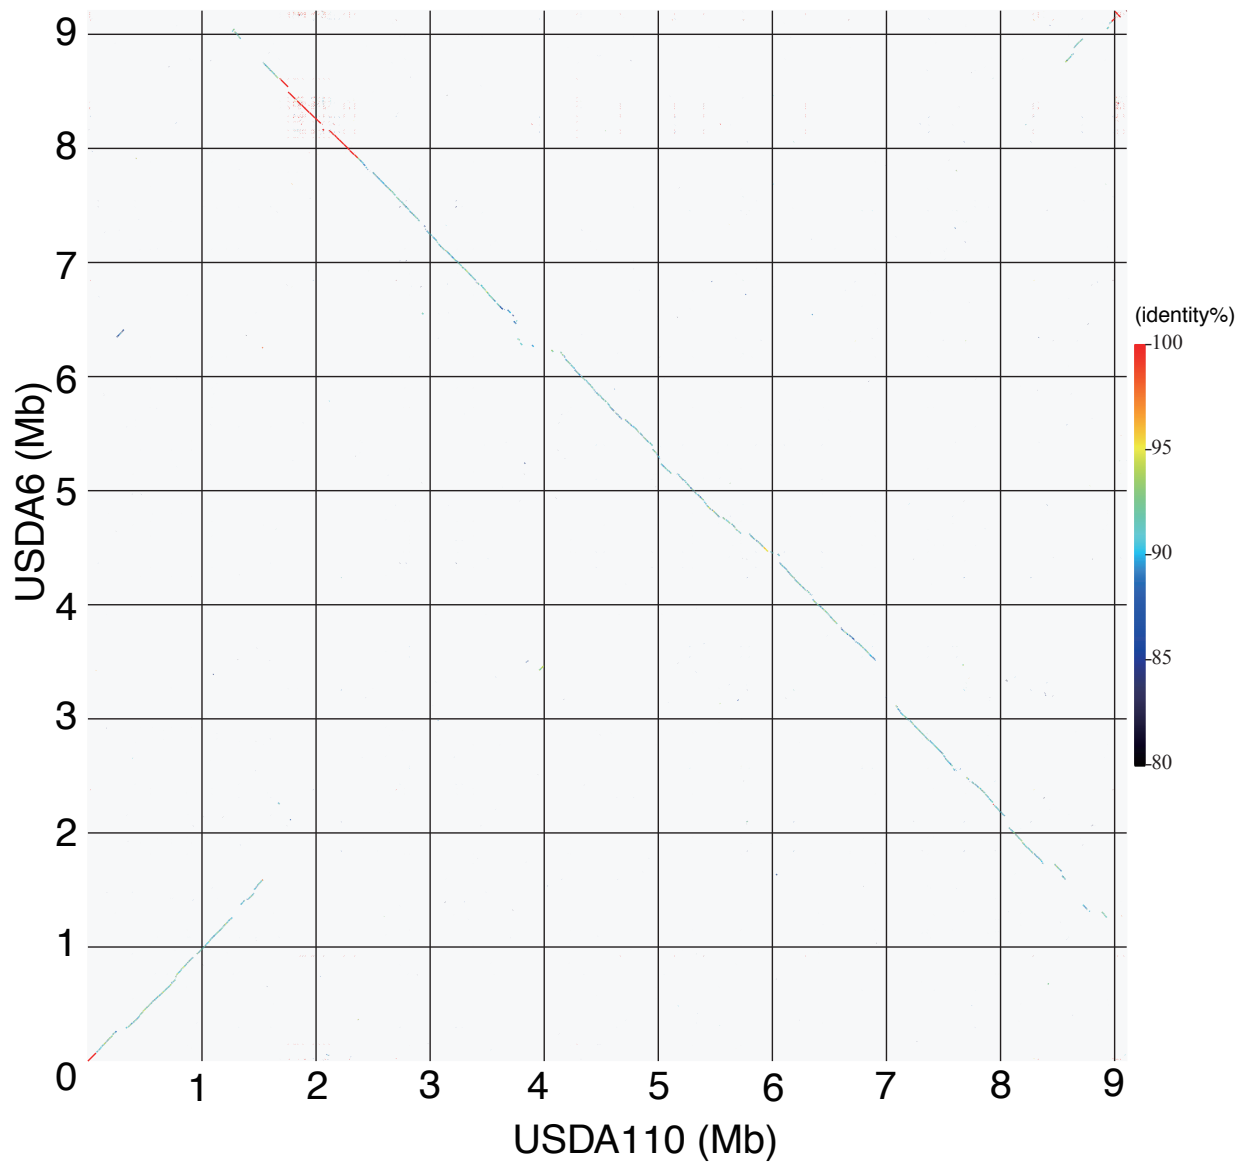

**Supplemental Figure 2. Dot plot of a BLASTN comparison of strains USDA110 and USDA6 whole-genome sequences.** Horizontal axis: position on the USDA110 genome sequence (Mb); vertical axis: position on the USDA6 genome sequence (Mb). Colors indicate the % nucleotide identity in the alignment output by BLASTN, according to the scale on the right.

Supplemental Table1    List of all predicted genes for each locus A, B, C (putative symbiosis island)

|        | gene_ID(locus_tag) | left_position | right_position | direction | COG_category | product_name | gene_name                                                  | USDA110gene |
|--------|--------------------|---------------|----------------|-----------|--------------|--------------|------------------------------------------------------------|-------------|
| locusB | BJ6T21770          | 2248480       | 2249811        | +         | L            | COG0582      | probable site-specific integrase/recombinase               | blI7217     |
| locusB | BJ6T21780          | 2249756       | 2250121        | −         |              |              | hypothetical protein                                       | blr7216     |
| locusB | BJ6T21790          | 2250440       | 2250811        |           |              |              | hypothetical protein                                       |             |
| locusB | BJ6T21800          | 2250774       | 2251244        | +         |              |              | hypothetical protein                                       | blI7214     |
| locusB | BJ6T21810          | 2251291       | 2251500        | +         |              |              | hypothetical protein                                       | blI7214     |
| locusB | BJ6T21820          | 2251789       | 2251974        |           |              |              | hypothetical protein                                       |             |
| locusB | BJ6T21830          | 2252197       | 2252640        | +         | R            | COG0824      | hypothetical protein                                       | blI7212     |
| locusA | BJ6T76650          | 7920139       | 7921173        | +         |              |              | hypothetical protein                                       | blI2187     |
| locusA | BJ6T76660          | 7921170       | 7921550        | +         |              |              | hypothetical protein                                       | blI2186     |
| locusA | BJ6T76670          | 7921602       | 7922600        | +         | R            | COG1204      | hypothetical protein                                       | blI2185     |
| locusA | BJ6T76680          | 7922645       | 7923088        | +         |              |              | hypothetical protein                                       | blI2184     |
| locusA | BJ6T76690          | 7923107       | 7923403        | +         |              |              | hypothetical protein                                       | bsI2183     |
| locusA | BJ6T76700          | 7924049       | 7924279        | +         |              |              | hypothetical protein                                       | bsI2182     |
| locusA | BJ6T76710          | 7924332       | 7924493        | +         |              |              | hypothetical protein                                       | bsI2181     |
| locusA | BJ6T76720          | 7924527       | 7925723        | −         | T            | COG0642      | hypothetical protein                                       | blr2180     |
| locusA | BJ6T76730          | 7926093       | 7926326        | +         | T            | COG0784      | hypothetical protein                                       | bsI2179     |
| locusA | BJ6T76740          | 7926765       | 7928447        | −         | T            | COG0642      | two-component hybrid sensor and regulator                  | blr2178     |
| locusA | BJ6T76750          | 7928434       | 7929954        | −         | T            | COG0467      | hypothetical protein                                       | blr2177     |
| locusA | BJ6T76760          | 7930165       | 7932159        | +         | T            | COG2202      | two-component hybrid sensor and regulator                  | blI2176     |
| locusA | BJ6T76770          | 7932265       | 7932450        | +         |              |              | hypothetical protein                                       | bsI2175     |
| locusA | BJ6T76780          | 7932667       | 7933611        | −         | C            | COG1012      | malonic semialdehyde oxidative decarboxylase               | blI2174     |
| locusA | BJ6T76790          | 7933658       | 7934128        | +         | N            | COG3839      | hypothetical protein                                       | blI2173     |
| locusA | BJ6T76800          | 7934163       | 7935053        | +         | G            | COG3386      | hypothetical protein                                       | blI2172     |
| locusA | BJ6T76810          | 7935099       | 7936898        | −         | S            | COG1593      | probable ABC transporter permease protein                  | blr2171     |
| locusA | BJ6T76820          | 7936988       | 7938013        | −         | G            | COG1638      | probable ABC transporter substrate-binding protein         | blr2170     |
| locusA | BJ6T76830          | 7938207       | 7939217        | −         | G            | COG0021      | putative transketolase beta subunit protein                | blr2169     |
| locusA | BJ6T76840          | 7939214       | 7940065        | −         | G            | COG0021      | putative transketolase alpha subunit protein               | blr2168     |
| locusA | BJ6T76850          | 7940090       | 7940854        | −         | Q            | COG1028      | oxidoreductase                                             | blr2167     |
| locusA | BJ6T76860          | 7940948       | 7941844        | +         | K            | COG0583      | transcriptional regulatory protein LysR family             | blI2166     |
| locusA | BJ6T76870          | 7942516       | 7942719        |           |              |              | hypothetical protein                                       |             |
| locusA | BJ6T76880          | 7943146       | 7943448        |           |              |              | hypothetical protein                                       |             |
| locusA | BJ6T76890          | 7944452       | 7945657        | +         | L            | COG3328      | putative transposase                                       | blI2163     |
| locusA | BJ6T76900          | 7945889       | 7946038        | +         | S            | COG2135      | hypothetical protein                                       | blI2162     |
| locusA | BJ6T76910          | 7946120       | 7946371        |           |              |              | hypothetical protein                                       |             |
| locusA | BJ6T76920          | 7946490       | 7947707        | −         | I            | COG1835      | hypothetical protein                                       | blr2157     |
| locusA | BJ6T76930          | 7947973       | 7948221        | −         |              |              | hypothetical protein                                       | blr2156     |
| locusA | BJ6T76940          | 7948728       | 7949024        |           |              |              | hypothetical protein                                       |             |
| locusA | BJ6T76950          | 7949218       | 7949448        | +         |              |              | hypothetical protein                                       | blI2154     |
| locusA | BJ6T76960          | 7949770       | 7950306        | −         |              |              | hypothetical protein                                       | blr2153     |
| locusA | BJ6T76970          | 7950962       | 7951186        | −         | L            | COG2801      | hypothetical protein                                       | bsr2152     |
| locusA | BJ6T76980          | 7951219       | 7951428        | −         | L            | COG2801      | hypothetical protein                                       | bsr2151     |
| locusA | BJ6T76990          | 7951448       | 7952350        | −         |              |              | hypothetical protein                                       | blr2150     |
| locusA | BJ6T77000          | 7952337       | 7953896        | −         |              |              | hypothetical protein                                       | blr2149     |
| locusA | BJ6T77010          | 7954039       | 7955046        | −         | H            | COG0142      | farnesyl diphosphate synthase                              | blI2148     |
| locusA | BJ6T77020          | 7955192       | 7956535        | −         | Q            | COG2124      | cytochrome P-450 BJ-4                                      | CYP117      |
| locusA | BJ6T77030          | 7956535       | 7957380        | −         | Q            | COG1028      | dehydrogenase                                              | blr2146     |
| locusA | BJ6T77040          | 7957385       | 7957675        |           | Q            | COG1028      | hypothetical protein                                       |             |
| locusA | BJ6T77050          | 7957677       | 7958966        | −         | Q            | COG2124      | cytochrome P-450 BJ-3                                      | CYP114      |
| locusA | BJ6T77060          | 7959061       | 7960266        | −         | Q            | COG2124      | cytochrome P-450 BJ-1                                      | CYP112      |
| locusA | BJ6T77070          | 7960283       | 7960588        | −         | Q            | COG2124      | similar to cytochrome P450-family protein                  | blr2143     |
| locusA | BJ6T77080          | 7960811       | 7961248        | +         |              |              | hypothetical protein                                       | blI2142     |
| locusA | BJ6T77090          | 7961360       | 7961896        | +         |              |              | hypothetical protein                                       | blI2141     |
| locusA | BJ6T77100          | 7961839       | 7962654        | −         |              |              | hypothetical protein                                       | blr2140     |
| locusA | BJ6T77110          | 7963053       | 7963466        | +         | L            | COG2963      | putative transposase                                       | blI2139     |
| locusA | BJ6T77120          | 7963677       | 7964897        | +         | L            | COG0582      | probable site-specific integrase/recombinase               | blI2138     |
| locusA | BJ6T77130          | 7964897       | 7965517        | +         | L            | COG0582      | putative integrase/recombinase protein                     | blI2137     |
| locusA | BJ6T77140          | 7966446       | 7967579        | −         | K            | COG1167      | putative aminotransferase                                  | blr2136     |
| locusA | BJ6T77150          | 7967599       | 7969176        | −         | J            | COG0143      | hypothetical protein                                       | blr2135     |
| locusA | BJ6T77160          | 7969178       | 7969507        | −         |              |              | hypothetical protein                                       | blr2134     |
| locusA | BJ6T77170          | 7969532       | 7970311        | −         |              |              | hypothetical protein                                       | blr2133     |
| locusA | BJ6T77180          | 7970277       | 7971581        | −         |              |              | hypothetical protein                                       | blr2132     |
| locusA | BJ6T77190          | 7971578       | 7973080        | −         | Q            | COG3486      | probable oxygenase                                         | blr2131     |
| locusA | BJ6T77200          | 7973249       | 7973452        |           |              |              | hypothetical protein                                       |             |
| locusA | BJ6T77210          | 7973516       | 7973836        | −         | N            | COG3505      | similar to conjugal transfer protein traG                  | blr2130     |
| locusA | BJ6T77220          | 7973946       | 7974182        | −         | N            | COG3505      | hypothetical protein                                       | bsr2129     |
| locusA | BJ6T77230          | 7974622       | 7975125        | +         |              |              | hypothetical protein                                       | blI2128     |
| locusA | BJ6T77240          | 7975361       | 7975645        | −         |              |              | hypothetical protein                                       | bsr2127     |
| locusA | BJ6T77250          | 7975630       | 7976214        | +         |              |              | hypothetical protein                                       | blI2126     |
| locusA | BJ6T77260          | 7976508       | 7977425        | +         | Q            | COG2175      | probable dioxygenase                                       | blI2125     |
| locusA | BJ6T77270          | 7978337       | 7979092        | −         |              |              | hypothetical protein                                       | blr2124     |
| locusA | BJ6T77280          | 7979116       | 7979682        | −         | O            | COG0265      | hypothetical protein                                       | blr2123     |
| locusA | BJ6T77290          | 7979840       | 7980010        |           |              |              | hypothetical protein                                       |             |
| locusA | BJ6T77300          | 7980385       | 7980669        | −         |              |              | hypothetical protein                                       | blr2122     |
| locusA | BJ6T77310          | 7981383       | 7981790        | +         |              |              | hypothetical protein                                       | blI2121     |
| locusA | BJ6T77320          | 7981926       | 7982132        | +         | K            | COG1278      | cold shock protein                                         | cspA        |
| locusA | BJ6T77330          | 7982427       | 7982957        | −         | P            | COG3703      | probable cation transport protein                          | blr2119     |
| locusA | BJ6T77340          | 7983003       | 7983572        | −         |              |              | hypothetical protein                                       | blr2118     |
| locusA | BJ6T77350          | 7983686       | 7985026        |           |              |              | hypothetical protein                                       |             |
| locusA | BJ6T77360          | 7985058       | 7986974        |           |              |              | hypothetical protein                                       |             |
| locusA | BJ6T77370          | 7986981       | 7987529        |           |              |              | hypothetical protein                                       |             |
| locusA | BJ6T77380          | 7987673       | 7988797        | −         |              |              | hypothetical protein                                       | blr2115     |
| locusA | BJ6T77390          | 7988810       | 7989130        | −         |              |              | hypothetical protein                                       | blr2114     |
| locusA | BJ6T77400          | 7989127       | 7989501        | −         |              |              | hypothetical protein                                       | blr2113     |
| locusA | BJ6T77410          | 7989926       | 7990156        | +         |              |              | hypothetical protein                                       | bsI2112     |
| locusA | BJ6T77420          | 7990297       | 7990569        | −         |              |              | hypothetical protein                                       | bsr2110     |
| locusA | BJ6T77430          | 7991408       | 7992091        | +         | T            | COG0664      | transcriptional regulatory protein Crp family              | blI2109     |
| locusA | BJ6T77440          | 7993713       | 8002292        | −         | Q            | COG1020      | probable peptide synthetase                                | blr2108     |
| locusA | BJ6T77450          | 8002271       | 8002942        | −         | Q            | COG1020      | probable peptide synthetase                                | blr2108     |
| locusA | BJ6T77460          | 8003516       | 8004064        | +         |              |              | hypothetical protein                                       | blI2107     |
| locusA | BJ6T77470          | 8004189       | 8004479        | −         |              |              | L-ectoine synthase                                         | ectC        |
| locusA | BJ6T77480          | 8005309       | 8005587        | −         |              |              | hypothetical protein                                       | bsr2105     |
| locusA | BJ6T77490          | 8005984       | 8006187        |           |              |              | hypothetical protein                                       |             |
| locusA | BJ6T77500          | 8006533       | 8006733        | −         |              |              | hypothetical protein                                       | blI2104     |
| locusA | BJ6T77510          | 8007402       | 8007761        | −         |              |              | hypothetical protein                                       | blr2103     |
| locusA | BJ6T77520          | 8007774       | 8008625        | −         | H            | COG0414      | pantoate---beta-alanine ligase                             | panC        |
| locusA | BJ6T77530          | 8008629       | 8009525        | −         | H            | COG0413      | 3-methyl-2-oxobutanoate hydroxymethyltransferase           | panB        |
| locusA | BJ6T77540          | 8009542       | 8009859        | −         |              |              | hypothetical protein                                       | blr2100     |
| locusA | BJ6T77550          | 8009875       | 8010084        |           |              |              | hypothetical protein                                       |             |
| locusA | BJ6T77560          | 8010753       | 8011946        | −         | H            | COG0161      | adenosylmethionine-8-amino-7-oxononanoate aminotransferase | bioA        |
| locusA | BJ6T77570          | 8012015       | 8012650        | −         | H            | COG0132      | dethiobiotin synthase                                      | bioD        |
| locusA | BJ6T77580          | 8012647       | 8013801        | −         | H            | COG0156      | 8-amino-7-oxononanoate synthase                            | bioF        |
| locusA | BJ6T77590          | 8013878       | 8014216        | −         | H            | COG0853      | aspartate 1-decarboxylase precursor                        | panD        |
| locusA | BJ6T77600          | 8014281       | 8015276        | −         | H            | COG0502      | biotin synthetase                                          | bioB        |
| locusA | BJ6T77610          | 8015643       | 8016026        | +         | K            | COG1802      | transcriptional regulatory protein GntR family             | blI2094     |

|        |           |         |         |   |   |         |                                                                        |               |          |
|--------|-----------|---------|---------|---|---|---------|------------------------------------------------------------------------|---------------|----------|
| locusA | BJ6T77620 | 8016162 | 8016479 | + |   |         | hypothetical protein                                                   |               | bl 2093  |
| locusA | BJ6T77630 | 8016618 | 8018027 | + | E | COG0147 | para-aminobenzoate synthase component I                                | <i>pabB</i>   | bl 2092  |
| locusA | BJ6T77640 | 8018024 | 8018620 | + | E | COG0512 | para-aminobenzoate synthase glutamine amidotransferase component II    | <i>pabA</i>   | bl 2091  |
| locusA | BJ6T77650 | 8019291 | 8019764 | - |   |         | hypothetical protein                                                   |               | bl 2089  |
| locusA | BJ6T77660 | 8019761 | 8020048 | - |   |         | hypothetical protein                                                   |               | bsr 2088 |
| locusA | BJ6T77670 | 8020064 | 8020273 |   |   |         | hypothetical protein                                                   |               |          |
| locusA | BJ6T77680 | 8020458 | 8023187 | + |   |         | hypothetical protein                                                   |               | bl 2087  |
| locusA | BJ6T77690 | 8023858 | 8024025 | + |   |         | hypothetical protein                                                   |               | bsl 2086 |
| locusA | BJ6T77700 | 8024326 | 8025558 | + |   |         | hypothetical protein                                                   |               | bl 2085  |
| locusA | BJ6T77710 | 8025666 | 8026001 |   |   |         | hypothetical protein                                                   |               |          |
| locusA | BJ6T77720 | 8026159 | 8027496 | - | E | COG0174 | putative glutamine synthetase                                          |               | bl 2084  |
| locusA | BJ6T77730 | 8027496 | 8028782 | - | I | COG0439 | hypothetical protein                                                   |               | bl 2083  |
| locusA | BJ6T77740 | 8028779 | 8029681 | - |   |         | hypothetical protein                                                   |               | bl 2082  |
| locusA | BJ6T77750 | 8029812 | 8030483 | - | R | COG2071 | putative amidotransferase subunit                                      |               | bl 2081  |
| locusA | BJ6T77760 | 8030624 | 8031682 | - | I | COG3239 | putative dihydrorhizobitoxine desaturase                               | <i>rtxC</i>   | bl 2080  |
| locusA | BJ6T77770 | 8031714 | 8034125 | - | E | COG2873 | rtxA homolog                                                           |               | bl 2077  |
| locusA | BJ6T77780 | 8034731 | 8035060 | + |   |         | hypothetical protein                                                   |               | bl 2075  |
| locusA | BJ6T77790 | 8035872 | 8036165 | - |   |         | NoeE homolog                                                           |               | bl 2074  |
| locusA | BJ6T77800 | 8036589 | 8036840 | - |   |         | hypothetical protein                                                   |               | bl 2073  |
| locusA | BJ6T77810 | 8037915 | 8038100 |   |   |         | hypothetical protein                                                   |               |          |
| locusA | BJ6T77820 | 8038116 | 8038472 |   |   |         | hypothetical protein                                                   |               |          |
| locusA | BJ6T77830 | 8039209 | 8039460 | - |   |         | hypothetical protein                                                   |               | bsr 2072 |
| locusA | BJ6T77840 | 8040258 | 8040623 | - |   |         | similar to inosamine-phosphate amidinotransferas                       |               | bl 2071  |
| locusA | BJ6T77850 | 8040633 | 8040854 |   |   |         | hypothetical protein                                                   |               |          |
| locusA | BJ6T77860 | 8041484 | 8041672 |   |   |         | hypothetical protein                                                   |               |          |
| locusA | BJ6T77870 | 8044069 | 8046414 | - | E | COG0620 | 5-methyltetrahydropteroyltriglutamate-homocysteine S-methyltransferase | <i>metE</i>   | bl 2068  |
| locusA | BJ6T77880 | 8046513 | 8046788 |   |   |         | hypothetical protein                                                   |               |          |
| locusA | BJ6T77890 | 8047705 | 8048430 | + |   |         | nodulate formation efficiency C protein                                | <i>nfeC</i>   | bl 2067  |
| locusA | BJ6T77900 | 8049565 | 8050278 | + | L | COG1525 | hypothetical protein                                                   |               | bl 2066  |
| locusA | BJ6T77910 | 8050287 | 8051030 | + | P | COG0288 | carbonic anhydrase                                                     | <i>icfA</i>   | bl 2065  |
| locusA | BJ6T77920 | 8051397 | 8051675 | + |   |         | hypothetical protein                                                   |               | bsl 2064 |
| locusA | BJ6T77930 | 8052927 | 8054093 | + | I | COG1960 | phenolhydroxylase homolog                                              | <i>nrgC</i>   | bl 2063  |
| locusA | BJ6T77940 | 8054916 | 8055563 | - | Q | COG0500 | nodulation protein                                                     | <i>noeI</i>   | bl 2062  |
| locusA | BJ6T77950 | 8056514 | 8056828 | + | O | COG0234 | GroES3 chaperonin                                                      | <i>groES3</i> | bl 2060  |
| locusA | BJ6T77960 | 8056913 | 8058553 | + | O | COG0459 | GroEL3 chaperonin                                                      | <i>groEL3</i> | bl 2059  |
| locusA | BJ6T77970 | 8059793 | 8060308 | - |   |         | hypothetical protein                                                   |               | bl 2058  |
| locusA | BJ6T77980 | 8061701 | 8061862 |   |   |         | hypothetical protein                                                   |               |          |
| locusA | BJ6T77990 | 8062802 | 8063407 | - | L | COG3547 | hypothetical protein                                                   |               | bl 2055  |
| locusA | BJ6T78000 | 8063370 | 8063846 | - | L | COG3547 | hypothetical protein                                                   |               | bl 2055  |
| locusA | BJ6T78010 | 8063936 | 8064823 | - | L | COG2801 | putative transposase                                                   |               | bl 2054  |
| locusA | BJ6T78020 | 8064786 | 8065040 | - | L | COG2801 | putative transposase                                                   |               | bl 2053  |
| locusA | BJ6T78030 | 8065217 | 8066461 | - | L | COG3344 | probable maturase; reverse transcriptase                               |               | bl 2052  |
| locusA | BJ6T78040 | 8067970 | 8068203 | - |   |         | hypothetical protein                                                   |               | bsr 2051 |
| locusA | BJ6T78050 | 8068671 | 8068970 | + |   |         | hypothetical protein                                                   |               | bsl 2050 |
| locusA | BJ6T78060 | 8069400 | 8070413 | + | E | COG0547 | anthranilate phosphoribosyltransferase                                 | <i>trpD</i>   | bl 2049  |
| locusA | BJ6T78070 | 8070653 | 8070838 | + |   |         | hypothetical protein                                                   |               | bsl 2048 |
| locusA | BJ6T78080 | 8071251 | 8071616 | + |   |         | hypothetical protein                                                   |               | bl 2047  |
| locusA | BJ6T78090 | 8071967 | 8072746 | + |   |         | hypothetical protein                                                   |               | bl 2046  |
| locusA | BJ6T78100 | 8072774 | 8074084 | + |   |         | hypothetical protein                                                   |               | bl 2045  |
| locusA | BJ6T78110 | 8074623 | 8075021 |   |   |         | hypothetical protein                                                   |               |          |
| locusA | BJ6T78120 | 8075565 | 8076242 | - |   |         | hypothetical protein                                                   |               | bl 2042  |
| locusA | BJ6T78130 | 8076227 | 8077378 | - | S | COG3791 | hypothetical protein                                                   |               | bl 2041  |
| locusA | BJ6T78140 | 8077465 | 8077845 | + |   |         | hypothetical protein                                                   |               | bl 2040  |
| locusA | BJ6T78150 | 8078055 | 8078456 | - |   |         | hypothetical protein                                                   |               | bl 2039  |
| locusA | BJ6T78160 | 8078589 | 8079455 | - | C | COG2086 | electron transfer flavoprotein beta chain                              | <i>fixA</i>   | bl 2038  |
| locusA | BJ6T78170 | 8079973 | 8081721 | - | K | COG3604 | nif-specific regulatory protein                                        | <i>nifA</i>   | bl 2037  |
| locusA | BJ6T78180 | 8081974 | 8082810 | - | Q | COG1028 | oxidoreductase                                                         | <i>fixR</i>   | bl 2036  |
| locusA | BJ6T78190 | 8083539 | 8084117 | - |   |         | NodZ protein                                                           | <i>nodZ</i>   | bl 2035  |
| locusA | BJ6T78200 | 8084817 | 8086439 | - | O | COG2192 | NolO protein                                                           | <i>nolO</i>   | bl 2034  |
| locusA | BJ6T78210 | 8086460 | 8086843 | - | O | COG2192 | NolN protein                                                           | <i>nolN</i>   | bl 2033  |
| locusA | BJ6T78220 | 8086893 | 8087066 | - |   |         | hypothetical protein                                                   | <i>nolM</i>   | bsr 2032 |
| locusA | BJ6T78230 | 8087099 | 8087887 | - | R | COG0842 | NodJ protein                                                           | <i>nodJ</i>   | bl 2031  |
| locusA | BJ6T78240 | 8087891 | 8088805 | - | Q | COG1131 | transporter of Nod factors                                             | <i>nodI</i>   | bl 2030  |
| locusA | BJ6T78250 | 8088813 | 8090522 | - | O | COG2192 | 6-O-carbamoyl transferase                                              | <i>nodU</i>   | bl 2029  |
| locusA | BJ6T78260 | 8090536 | 8091165 | - | Q | COG0500 | N-methyl transferase                                                   | <i>nodS</i>   | bl 2028  |
| locusA | BJ6T78270 | 8091092 | 8092549 | - |   |         | chitin synthase                                                        | <i>nodC</i>   | bl 2027  |
| locusA | BJ6T78280 | 8092564 | 8093223 | - |   |         | de N-acatylase                                                         | <i>nodB</i>   | bl 2026  |
| locusA | BJ6T78290 | 8093220 | 8093852 | - |   |         | acyl transferase                                                       | <i>nodA</i>   | bl 2025  |
| locusA | BJ6T78295 | 8093894 | 8094532 | - |   |         | NodY protein                                                           | <i>nodY</i>   | bl 2024  |
| locusA | BJ6T78300 | 8095043 | 8095492 | + | L | COG3293 | putative transposase                                                   |               |          |
| locusA | BJ6T78310 | 8095532 | 8096425 | + | K | COG0583 | transcriptional regulatory protein LysR family                         | <i>nodD1</i>  | bl 2023  |
| locusA | BJ6T78320 | 8096620 | 8096973 | - |   |         | hypothetical protein                                                   |               | bl 2022  |
| locusA | BJ6T78330 | 8097248 | 8097538 |   |   |         | hypothetical protein                                                   |               |          |
| locusA | BJ6T78340 | 8098638 | 8098847 | + |   |         | hypothetical protein                                                   |               | bsl 2020 |
| locusA | BJ6T78350 | 8099039 | 8099683 | + | K | COG0789 | transcriptional regulatory protein MerR family                         | <i>nolA</i>   | bl 2019  |
| locusA | BJ6T78360 | 8100000 | 8100398 | + | E | COG0683 | hypothetical protein                                                   |               | bl 2018  |
| locusA | BJ6T78370 | 8100505 | 8101098 | + | E | COG0683 | similar to ABC transporter, amino acid binding protein                 |               | bl 2017  |
| locusA | BJ6T78380 | 8102577 | 8102939 | + |   |         | NolY                                                                   | <i>nolY</i>   | bl 2016  |
| locusA | BJ6T78390 | 8103046 | 8103273 | + |   |         | hypothetical protein                                                   | <i>nolZ</i>   | bsl 2015 |
| locusA | BJ6T78400 | 8103903 | 8104148 | + |   |         | hypothetical protein                                                   |               | bsl 2014 |
| locusA | BJ6T78410 | 8104971 | 8105696 | + |   |         | hypothetical protein                                                   |               | bl 2012  |
| locusA | BJ6T78420 | 8106334 | 8106696 | - |   |         | hypothetical protein                                                   |               | bl 2011  |
| locusA | BJ6T78430 | 8106668 | 8107072 | - |   |         | hypothetical protein                                                   |               | bsr 2010 |
| locusA | BJ6T78440 | 8107428 | 8108144 | + | R | COG0730 | hypothetical protein                                                   |               | bl 2009  |
| locusA | BJ6T78450 | 8108858 | 8109070 | - |   |         | hypothetical protein                                                   |               | bsr 2008 |
| locusA | BJ6T78460 | 8109787 | 8111124 | + | H | COG0635 | coproporphyrinogen III dehydrogenase                                   | <i>hemN1</i>  | bl 2007  |
| locusA | BJ6T78470 | 8111533 | 8112051 | - |   |         | hypothetical protein                                                   |               | bl 2006  |
| locusA | BJ6T78480 | 8112303 | 8113169 | - |   |         | hypothetical protein                                                   |               | bsr 2005 |
| locusA | BJ6T78490 | 8113266 | 8114936 | + |   |         | hypothetical protein                                                   |               | bl 2003  |
| locusA | BJ6T78500 | 8115068 | 8115448 | + | L | COG2801 | putative transposase                                                   |               | bl 2002  |
| locusA | BJ6T78510 | 8115456 | 8116091 | - |   |         | hypothetical protein                                                   |               | bl 2001  |
| locusA | BJ6T78520 | 8116405 | 8116683 | - |   |         | hypothetical protein                                                   |               | bsr 1999 |
| locusA | BJ6T78530 | 8117684 | 8118097 |   |   |         | hypothetical protein                                                   |               |          |
| locusA | BJ6T78540 | 8118307 | 8119251 | - |   |         | hypothetical protein                                                   |               | bl 1998  |
| locusA | BJ6T78550 | 8119611 | 8119985 |   |   |         | hypothetical protein                                                   |               |          |
| locusA | BJ6T78560 | 8121435 | 8122475 | - |   |         | probable pectinesterase                                                |               | bl 1994  |
| locusA | BJ6T78570 | 8122694 | 8123992 | - |   |         | probable polygalacturonase                                             |               | bl 1993  |
| locusA | BJ6T78580 | 8124943 | 8125233 | - |   |         | hypothetical protein                                                   |               | bl 1992  |
| locusA | BJ6T78590 | 8125748 | 8126917 | - |   |         | hypothetical protein                                                   |               | bl 1991  |
| locusA | BJ6T78600 | 8126920 | 8130354 | - |   |         | hypothetical protein                                                   |               | bl 1990  |
| locusA | BJ6T78610 | 8130351 | 8130989 | - |   |         | hypothetical protein                                                   |               | bl 1989  |
| locusA | BJ6T78620 | 8130979 | 8132508 | - |   |         | hypothetical protein                                                   |               | bl 1988  |
| locusA | BJ6T78630 | 8132849 | 8133796 | + | L | COG3335 | putative transposase                                                   |               |          |
| locusA | BJ6T78640 | 8134100 | 8134351 | + | K | COG1396 | probable transcriptional regulator                                     |               | bsl 1986 |
| locusA | BJ6T78650 | 8134351 | 8135670 | + | R | COG3550 | HipA protein                                                           | <i>hipA</i>   | bl 1985  |
| locusA | BJ6T78660 | 8135667 | 8135933 |   |   |         | hypothetical protein                                                   |               |          |
| locusA | BJ6T78670 | 8135922 | 8136284 | - |   |         | putative transposase                                                   |               | bl 1984  |
| locusA | BJ6T78680 | 8137130 | 8137495 | + |   |         | hypothetical protein                                                   |               | bl 1981  |
| locusA | BJ6T78690 | 8137586 | 8138377 | + |   |         | hypothetical protein                                                   |               | bl 1980  |

|        |           |         |         |   |   |         |                                                |       |         |
|--------|-----------|---------|---------|---|---|---------|------------------------------------------------|-------|---------|
| locusA | BJ6T78700 | 8138371 | 8138679 | + |   |         | hypothetical protein                           |       | bl11979 |
| locusA | BJ6T78710 | 8138726 | 8139118 | + |   |         | hypothetical protein                           |       | bl11978 |
| locusA | BJ6T78720 | 8139819 | 8141798 | + | C | COG1032 | hypothetical protein                           |       | bl11977 |
| locusA | BJ6T78730 | 8142112 | 8142339 | - |   |         | hypothetical protein                           |       | bsr1976 |
| locusA | BJ6T78740 | 8142723 | 8144069 | + |   |         | putative transposase                           |       |         |
| locusA | BJ6T78750 | 8144446 | 8144601 |   | L | COG2801 | hypothetical protein                           |       |         |
| locusA | BJ6T78760 | 8144682 | 8144981 | - | L | COG2963 | putative transposase                           |       | bsr1972 |
| locusA | BJ6T78770 | 8145187 | 8147505 | - | E | COG1506 | putative peptidase                             |       | blr1971 |
| locusA | BJ6T78780 | 8147875 | 8148207 | - |   |         | hypothetical protein                           |       | blr1970 |
| locusA | BJ6T78790 | 8148462 | 8149082 | - | L | COG3316 | hypothetical protein                           |       | blr1969 |
| locusA | BJ6T78800 | 8149026 | 8149268 | + |   |         | hypothetical protein                           |       | bsl1967 |
| locusA | BJ6T78810 | 8149290 | 8149550 | - |   |         | hypothetical protein                           |       | bsr1966 |
| locusA | BJ6T78820 | 8150695 | 8151432 | - |   |         | putative sugar hydrolase                       |       | blr1964 |
| locusA | BJ6T78830 | 8151673 | 8152041 | + |   |         | hypothetical protein                           |       | bl11963 |
| locusA | BJ6T78840 | 8152361 | 8153542 | - | L | COG3344 | hypothetical protein                           |       | blr1961 |
| locusA | BJ6T78850 | 8154134 | 8154325 |   |   |         | hypothetical protein                           |       |         |
| locusA | BJ6T78860 | 8154343 | 8156796 | - | M | COG1452 | hypothetical protein                           |       | blr1955 |
| locusA | BJ6T78870 | 8157184 | 8157900 | - |   |         | hypothetical protein                           |       | blr1954 |
| locusA | BJ6T78880 | 8157979 | 8158431 | - | L | COG3293 | putative transposase                           |       | blr1953 |
| locusA | BJ6T78890 | 8158347 | 8158739 | - | L | COG3293 | putative transposase                           |       |         |
| locusA | BJ6T78900 | 8160014 | 8160961 | - | L | COG3335 | putative transposase                           |       |         |
| locusA | BJ6T78910 | 8162726 | 8162986 | - |   |         | hypothetical protein                           |       | bsr1909 |
| locusA | BJ6T78920 | 8163705 | 8163932 | + | L | COG3316 | hypothetical protein                           |       | bsl1908 |
| locusA | BJ6T78930 | 8164190 | 8164444 | - |   |         | hypothetical protein                           |       | bsr1907 |
| locusA | BJ6T78940 | 8164443 | 8164895 | + | K | COG0454 | N-acetyltransferase NrgA homolog               |       | bl11906 |
| locusA | BJ6T78950 | 8165253 | 8165564 | - |   |         | hypothetical protein                           |       | blr1905 |
| locusA | BJ6T78960 | 8165599 | 8165769 |   |   |         | hypothetical protein                           |       |         |
| locusA | BJ6T78970 | 8165826 | 8167571 | - |   |         | hypothetical protein                           |       | blr1904 |
| locusA | BJ6T78980 | 8167764 | 8167952 |   |   |         | hypothetical protein                           |       |         |
| locusA | BJ6T78990 | 8168210 | 8168455 | - | L | COG3436 | hypothetical protein                           |       | bsr1903 |
| locusA | BJ6T79000 | 8169011 | 8169460 |   | C | COG2141 | hypothetical protein                           |       |         |
| locusA | BJ6T79010 | 8169676 | 8170746 |   | R | COG1853 | hypothetical protein                           |       |         |
| locusA | BJ6T79020 | 8171491 | 8171754 |   |   |         | hypothetical protein                           |       |         |
| locusA | BJ6T79030 | 8173374 | 8174516 |   | E | COG0687 | hypothetical protein                           |       |         |
| locusA | BJ6T79040 | 8175049 | 8175777 |   | G | COG0235 | hypothetical protein                           |       |         |
| locusA | BJ6T79050 | 8176434 | 8176637 |   | R | COG2130 | hypothetical protein                           |       |         |
| locusA | BJ6T79060 | 8176747 | 8177529 |   |   |         | hypothetical protein                           |       |         |
| locusA | BJ6T79070 | 8177810 | 8178529 |   |   |         | hypothetical protein                           |       |         |
| locusA | BJ6T79080 | 8178882 | 8179040 |   |   |         | hypothetical protein                           |       |         |
| locusA | BJ6T79090 | 8180217 | 8180396 |   |   |         | hypothetical protein                           |       |         |
| locusA | BJ6T79100 | 8180611 | 8180904 |   |   |         | hypothetical protein                           |       |         |
| locusA | BJ6T79110 | 8181557 | 8182522 |   | E | COG0111 | hypothetical protein                           |       |         |
| locusA | BJ6T79120 | 8182781 | 8182909 |   |   |         | hypothetical protein                           |       |         |
| locusA | BJ6T79130 | 8182976 | 8184376 |   | H | COG0161 | hypothetical protein                           |       |         |
| locusA | BJ6T79140 | 8184388 | 8185980 |   | C | COG1012 | hypothetical protein                           |       |         |
| locusA | BJ6T79150 | 8186055 | 8186531 |   | K | COG1522 | hypothetical protein                           |       |         |
| locusA | BJ6T79160 | 8187230 | 8188306 |   | E | COG3842 | hypothetical protein                           |       |         |
| locusA | BJ6T79170 | 8188368 | 8189084 |   | E | COG1177 | hypothetical protein                           |       |         |
| locusA | BJ6T79180 | 8189193 | 8189819 |   | L | COG1961 | hypothetical protein                           |       |         |
| locusA | BJ6T79190 | 8190042 | 8190347 |   | L | COG3436 | hypothetical protein                           |       |         |
| locusA | BJ6T79200 | 8190331 | 8190735 |   |   |         | hypothetical protein                           |       |         |
| locusA | BJ6T79210 | 8190949 | 8191218 |   |   |         | hypothetical protein                           |       |         |
| locusA | BJ6T79220 | 8191326 | 8191655 |   |   |         | hypothetical protein                           |       |         |
| locusA | BJ6T79230 | 8191615 | 8191800 |   |   |         | hypothetical protein                           |       |         |
| locusA | BJ6T79240 | 8192089 | 8192355 |   |   |         | hypothetical protein                           |       |         |
| locusA | BJ6T79250 | 8192960 | 8193691 |   | E | COG0665 | hypothetical protein                           |       |         |
| locusA | BJ6T79260 | 8193688 | 8194407 |   | G | COG0235 | hypothetical protein                           |       |         |
| locusA | BJ6T79270 | 8194409 | 8197078 |   | S | COG1262 | hypothetical protein                           |       |         |
| locusA | BJ6T79280 | 8197098 | 8197712 |   |   |         | hypothetical protein                           |       |         |
| locusA | BJ6T79290 | 8197719 | 8198675 |   | C | COG1052 | hypothetical protein                           |       |         |
| locusA | BJ6T79300 | 8198692 | 8199444 |   |   |         | hypothetical protein                           |       |         |
| locusA | BJ6T79310 | 8200868 | 8201293 |   |   |         | hypothetical protein                           |       |         |
| locusA | BJ6T79320 | 8201867 | 8202961 | - | E | COG1509 | hypothetical protein                           |       |         |
| locusA | BJ6T79330 | 8203634 | 8204080 |   |   |         | hypothetical protein                           |       |         |
| locusA | BJ6T79340 | 8205014 | 8206462 | - |   |         | hypothetical protein                           |       |         |
| locusA | BJ6T79350 | 8207081 | 8207599 | - | J | COG1186 | hypothetical protein                           |       |         |
| locusA | BJ6T79360 | 8207713 | 8209077 | - | R | COG0612 | hypothetical zinc protease                     |       |         |
| locusA | BJ6T79370 | 8209074 | 8210366 | - | R | COG0612 | hypothetical zinc protease                     |       |         |
| locusA | BJ6T79380 | 8211277 | 8212086 | - | L | COG1484 | putative transposase                           |       |         |
| locusA | BJ6T79390 | 8212083 | 8213555 | - |   |         | putative transposase                           |       |         |
| locusA | BJ6T79400 | 8214666 | 8216441 | - | Q | COG1132 | ABC transporter, HlyB/MsbA family              |       |         |
| locusA | BJ6T79410 | 8217155 | 8218147 |   | O | COG0526 | hypothetical protein                           |       |         |
| locusA | BJ6T79420 | 8219174 | 8219497 |   | G | COG2513 | hypothetical protein                           |       |         |
| locusA | BJ6T79430 | 8219824 | 8220168 | - |   |         | hypothetical protein                           |       |         |
| locusA | BJ6T79440 | 8220726 | 8220896 | - |   |         | hypothetical protein                           |       | bsr1885 |
| locusA | BJ6T79450 | 8221032 | 8221307 | + |   |         | hypothetical protein                           |       | bsl1884 |
| locusA | BJ6T79460 | 8221992 | 8223488 | - | K | COG1508 | RNA polymerase sigma-54 subunit                | rpoN1 | blr1883 |
| locusA | BJ6T79470 | 8223911 | 8224345 | - |   |         | hypothetical protein                           |       | blr1882 |
| locusA | BJ6T79480 | 8224606 | 8224935 | - |   |         | hypothetical protein                           |       | blr1881 |
| locusA | BJ6T79490 | 8225740 | 8226213 | - | K | COG2771 | transcriptional regulatory protein LuxR family |       | blr1880 |
| locusA | BJ6T79500 | 8227626 | 8228240 | - | O | COG2214 | hypothetical protein                           |       | blr1879 |
| locusA | BJ6T79510 | 8229647 | 8230975 | + |   |         | hypothetical protein                           |       | bl11877 |
| locusA | BJ6T79520 | 8230991 | 8231554 | - |   |         | hypothetical protein                           |       | blr1876 |
| locusA | BJ6T79530 | 8231660 | 8232076 | + | R | COG2940 | hypothetical protein                           |       | bl11875 |
| locusA | BJ6T79540 | 8232816 | 8233268 | - | L | COG3293 | putative transposase                           |       | bsr1874 |
| locusA | BJ6T79550 | 8233184 | 8233576 | - | L | COG3293 | putative transposase                           |       | blr1873 |
| locusA | BJ6T79560 | 8234136 | 8235767 | + |   |         | hypothetical protein                           |       | bl11872 |
| locusA | BJ6T79570 | 8236722 | 8236910 |   |   |         | hypothetical protein                           |       |         |
| locusA | BJ6T79580 | 8237924 | 8238499 | - |   |         | hypothetical protein                           |       | blr1869 |
| locusA | BJ6T79590 | 8239594 | 8239905 | - |   |         | hypothetical protein                           |       | blr1868 |
| locusA | BJ6T79600 | 8240112 | 8240684 | - | L | COG3436 | hypothetical protein                           |       | blr1867 |
| locusA | BJ6T79610 | 8240405 | 8241091 | - | L | COG3436 | hypothetical protein                           |       | blr1866 |
| locusA | BJ6T79620 | 8241111 | 8241485 | - | L | COG2963 | hypothetical protein                           |       | blr1865 |
| locusA | BJ6T79630 | 8241812 | 8243158 | + | G | COG0477 | citrate-proton symporter                       | citA  | bl11864 |
| locusA | BJ6T79640 | 8243855 | 8244418 | + |   |         | putative transposase                           |       | bl11861 |
| locusA | BJ6T79650 | 8244418 | 8244618 | + |   |         | hypothetical protein                           |       | bl11860 |
| locusA | BJ6T79660 | 8244770 | 8245276 | - |   |         | hypothetical protein                           |       | blr1859 |
| locusA | BJ6T79670 | 8245423 | 8245806 | + |   |         | hypothetical protein                           |       | bl11858 |
| locusA | BJ6T79680 | 8246040 | 8246312 | + |   |         | hypothetical protein                           |       | bsl1857 |
| locusA | BJ6T79690 | 8246390 | 8246683 | + | L | COG3293 | putative transposase                           |       | bsl1856 |
| locusA | BJ6T79700 | 8246826 | 8247836 | + | L | COG1425 | putative transposase                           |       | bl11855 |
| locusA | BJ6T79710 | 8248167 | 8250083 | - |   |         | hypothetical protein                           |       | blr1854 |
| locusA | BJ6T79720 | 8250837 | 8251817 | - | Q | COG2124 | cytochrome P450 family protein                 |       | blr1853 |
| locusA | BJ6T79730 | 8252629 | 8253510 | - | H | COG0414 | similar to pantoate--beta-alanine ligase       |       | blr1852 |
| locusA | BJ6T79740 | 8253695 | 8255176 | - | S | COG1357 | hypothetical protein                           |       | blr1851 |
| locusA | BJ6T79750 | 8255154 | 8255474 | - |   |         | hypothetical protein                           |       | blr1850 |
| locusA | BJ6T79760 | 8255904 | 8256056 | + |   |         | hypothetical protein                           |       | bsl1849 |
| locusA | BJ6T79770 | 8256583 | 8257491 | + |   |         | hypothetical protein                           |       | bl11848 |
| locusA | BJ6T79780 | 8257954 | 8258388 | - |   |         | VirK protein homolog                           |       | blr1847 |

|        |           |         |         |   |   |         |                                                        |              |         |
|--------|-----------|---------|---------|---|---|---------|--------------------------------------------------------|--------------|---------|
| locusA | BJ6T79790 | 8259074 | 8260054 | + |   |         | hypothetical protein                                   |              | bl1846  |
| locusA | BJ6T79800 | 8261255 | 8261431 | + |   |         | hypothetical protein                                   |              | bs1845  |
| locusA | BJ6T79810 | 8261648 | 8262028 | + |   |         | hypothetical protein                                   |              | bl1844  |
| locusA | BJ6T79820 | 8262068 | 8262757 | + | T | COG0745 | two-component response regulator                       | <i>basR</i>  | bl1843  |
| locusA | BJ6T79830 | 8262784 | 8264238 | + | N | COG1450 | RhcG2 protein                                          | <i>rhcC2</i> | bl1842  |
| locusA | BJ6T79840 | 8264249 | 8264911 | + |   |         | hypothetical protein                                   |              | bl1841  |
| locusA | BJ6T79850 | 8265107 | 8267422 | + |   |         | hypothetical protein                                   |              | bl1840  |
| locusA | BJ6T79860 | 8267715 | 8269097 | − | L | COG3344 | probable reverse transcriptase/maturase family protein |              | blr1837 |
| locusA | BJ6T79870 | 8270095 | 8270577 | + |   |         | hypothetical protein                                   |              | bl1836  |
| locusA | BJ6T79880 | 8270631 | 8271341 | − | L | COG1484 | putative transposase                                   |              | blr1835 |
| locusA | BJ6T79890 | 8271347 | 8272705 | − |   |         | putative transposase                                   |              | blr1834 |
| locusA | BJ6T79900 | 8272809 | 8273651 | − |   |         | hypothetical protein                                   |              | blr1833 |
| locusA | BJ6T79910 | 8273352 | 8274686 | + |   |         | putative transposase                                   |              | bl1832  |
| locusA | BJ6T79920 | 8274816 | 8275022 | − |   |         | hypothetical protein                                   |              | bsr1831 |
| locusA | BJ6T79930 | 8275857 | 8276258 | − |   |         | hypothetical protein                                   |              | blr1830 |
| locusA | BJ6T79940 | 8277262 | 8278209 | − | L | COG3335 | putative transposase                                   |              | blr1829 |
| locusA | BJ6T79950 | 8278475 | 8278648 | + |   |         | hypothetical protein                                   |              | bs1828  |
| locusA | BJ6T79960 | 8279034 | 8280065 | − | L | COG3547 | putative transposase                                   |              | blr1827 |
| locusA | BJ6T79970 | 8280388 | 8280720 | + | L | COG3547 | putative transposase                                   |              | bl1826  |
| locusA | BJ6T79980 | 8281055 | 8281477 |   |   |         | hypothetical protein                                   |              |         |
| locusA | BJ6T79990 | 8281898 | 8282416 | + | L | COG3293 | hypothetical protein                                   |              | bl1824  |
| locusA | BJ6T80000 | 8282208 | 8282657 | + | L | COG3293 | putative transposase                                   |              | bl1823  |
| locusA | BJ6T80010 | 8282667 | 8283704 | − | N | COG1377 | RhcU protein                                           | <i>rhcU</i>  | blr1822 |
| locusA | BJ6T80020 | 8283701 | 8284522 | − | N | COG1684 | RhcT protein                                           | <i>rhcT</i>  | blr1821 |
| locusA | BJ6T80030 | 8284533 | 8284808 | − | N | COG1987 | RhcS protein                                           | <i>rhcS</i>  | bsr1820 |
| locusA | BJ6T80040 | 8284811 | 8285476 | − | N | COG1338 | RhcR protein                                           | <i>rhcR</i>  | blr1819 |
| locusA | BJ6T80050 | 8285469 | 8286590 | − | N | COG1886 | RhcQ protein                                           | <i>rhcQ</i>  | blr1818 |
| locusA | BJ6T80060 | 8286587 | 8287123 | − |   |         | hypothetical protein                                   |              | blr1817 |
| locusA | BJ6T80070 | 8287099 | 8288454 | − | N | COG1157 | RhcN protein                                           | <i>rhcN</i>  | blr1816 |
| locusA | BJ6T80080 | 8288451 | 8289071 | − | N | COG1317 | nodulation protein                                     | <i>nolV</i>  | blr1815 |
| locusA | BJ6T80090 | 8289068 | 8289706 | − |   |         | nodulation protein                                     | <i>nolU</i>  | blr1814 |
| locusA | BJ6T80100 | 8289718 | 8290581 | − | N | COG1766 | RhcJ protein                                           | <i>rhcJ</i>  | blr1813 |
| locusA | BJ6T80110 | 8290590 | 8290895 | − |   |         | nodulation protein                                     | <i>nolB</i>  | blr1812 |
| locusA | BJ6T80120 | 8291504 | 8291965 | + | N | COG1450 | RhcC1 protein                                          | <i>rhcC1</i> | bl1811  |
| locusA | BJ6T80130 | 8292246 | 8292749 | + |   |         | hypothetical protein                                   |              | bl1810  |
| locusA | BJ6T80140 | 8292695 | 8292928 | − |   |         | hypothetical protein                                   |              | bsr1809 |
| locusA | BJ6T80150 | 8293115 | 8293318 | + |   |         | hypothetical protein                                   |              | bs1808  |
| locusA | BJ6T80160 | 8293889 | 8294836 | − | L | COG3335 | putative transposase                                   |              | blr1807 |
| locusA | BJ6T80170 | 8295108 | 8296562 | − |   |         | hypothetical protein                                   |              | blr1806 |
| locusA | BJ6T80180 | 8296813 | 8297373 | + |   |         | hypothetical protein                                   |              | bl1805  |
| locusA | BJ6T80190 | 8297471 | 8297779 | + |   |         | hypothetical protein                                   |              | bl1804  |
| locusA | BJ6T80200 | 8297822 | 8298013 |   |   |         | hypothetical protein                                   |              |         |
| locusA | BJ6T80210 | 8298130 | 8299023 | + |   |         | hypothetical protein                                   |              | bl1803  |
| locusA | BJ6T80220 | 8299057 | 8299593 | + |   |         | hypothetical protein                                   |              | bl1802  |
| locusA | BJ6T80230 | 8299596 | 8300024 | + |   |         | hypothetical protein                                   |              | bl1801  |
| locusA | BJ6T80240 | 8300034 | 8302133 | + | N | COG1298 | RhcV protein                                           | <i>rhcV</i>  | bl1800  |
| locusA | BJ6T80250 | 8302164 | 8302754 | + | R | COG0457 | hypothetical protein                                   |              | bl1799  |
| locusA | BJ6T80260 | 8302879 | 8303301 | + |   |         | hypothetical protein                                   |              | bl1798  |
| locusA | BJ6T80270 | 8303322 | 8303744 | + |   |         | hypothetical protein                                   |              | bl1797  |
| locusA | BJ6T80280 | 8303719 | 8304171 | + |   |         | hypothetical protein                                   |              | bl1796  |
| locusA | BJ6T80290 | 8304859 | 8306205 | + | R | COG0612 | similar to zinc protease                               |              | bl1795  |
| locusA | BJ6T80300 | 8306361 | 8306924 | + | R | COG0612 | similar to protease                                    |              | bl1793  |
| locusA | BJ6T80310 | 8306836 | 8307648 | + | R | COG0612 | similar to zinc protease                               |              | bl1792  |
| locusA | BJ6T80320 | 8308184 | 8308933 | + |   |         | hypothetical protein                                   |              | bl1791  |
| locusA | BJ6T80330 | 8308988 | 8309707 | + |   |         | hypothetical protein                                   |              | bl1790  |
| locusA | BJ6T80340 | 8309866 | 8310315 | − |   |         | hypothetical protein                                   |              | blr1789 |
| locusA | BJ6T80350 | 8310254 | 8310592 | − |   |         | hypothetical protein                                   |              | blr1788 |
| locusA | BJ6T80360 | 8310782 | 8311171 | − |   |         | hypothetical protein                                   |              | blr1787 |
| locusA | BJ6T80370 | 8312276 | 8312578 | + |   |         | hypothetical protein                                   |              | bl1786  |
| locusA | BJ6T80380 | 8313053 | 8313442 | − |   |         | hypothetical protein                                   |              | blr1785 |
| locusA | BJ6T80390 | 8314624 | 8315733 | + | P | COG1118 | molybdenum transport ATP-binding protein modC homolog  |              | bl1780  |
| locusA | BJ6T80400 | 8315790 | 8317058 | + | L | COG3328 | putative transposase                                   |              | bl1779  |
| locusA | BJ6T80410 | 8317179 | 8318135 | + |   |         | hypothetical protein                                   |              | bl1778  |
| locusA | BJ6T80420 | 8318087 | 8318641 | + | O | COG0450 | alkyl hydroperoxide reductase                          | <i>ahpC</i>  | bl1777  |
| locusA | BJ6T80430 | 8318648 | 8319196 | + | S | COG2128 | alkyl hydroperoxide reductase                          | <i>ahpD</i>  | bl1776  |
| locusA | BJ6T80440 | 8319408 | 8319704 | − | C | COG2440 | probable ferredoxin                                    | <i>fixX</i>  | bsr1775 |
| locusA | BJ6T80450 | 8319743 | 8321050 | − | C | COG0644 | flavoprotein                                           | <i>fixC</i>  | blr1774 |
| locusA | BJ6T80460 | 8321062 | 8322171 | − | C | COG2025 | electron transfer flavoprotein alpha chain             | <i>fixB</i>  | blr1773 |
| locusA | BJ6T80470 | 8322777 | 8322986 | + |   |         | hypothetical protein                                   |              | bs1772  |
| locusA | BJ6T80480 | 8323122 | 8323463 | − |   |         | nitrogenase stabilizing/protective protein             | <i>nifW</i>  | blr1771 |
| locusA | BJ6T80490 | 8324118 | 8324894 | − |   |         | molybdenum processing protein                          | <i>nifQ</i>  | blr1770 |
| locusA | BJ6T80500 | 8325041 | 8325925 | − | P | COG1348 | dinitrogenase reductase protein                        | <i>nifH</i>  | blr1769 |
| locusA | BJ6T80510 | 8326107 | 8326316 | − |   |         | hypothetical protein                                   |              | blr1768 |
| locusA | BJ6T80520 | 8326643 | 8326918 | + |   |         | hypothetical protein                                   |              | bl1767  |
| locusA | BJ6T80530 | 8327140 | 8327871 | + | M | COG3047 | outer membrane protein                                 |              | bl1766  |
| locusA | BJ6T80540 | 8328277 | 8328624 | − |   |         | ferredoxin                                             | <i>fer2</i>  | blr1765 |
| locusA | BJ6T80550 | 8328775 | 8329071 | − |   |         | hypothetical protein                                   |              | bsr1764 |
| locusA | BJ6T80560 | 8329344 | 8329688 | − |   |         | hypothetical protein                                   |              | blr1763 |
| locusA | BJ6T80570 | 8329722 | 8330081 |   |   |         | hypothetical protein                                   |              |         |
| locusA | BJ6T80580 | 8330020 | 8330337 |   |   |         | hypothetical protein                                   |              |         |
| locusA | BJ6T80590 | 8330334 | 8330648 | − |   |         | iron-sulfur cofactor synthesis protein                 | <i>nifZ</i>  | blr1761 |
| locusA | BJ6T80600 | 8330899 | 8331189 | − | C | COG1145 | hypothetical protein                                   | <i>frxA</i>  | bsr1760 |
| locusA | BJ6T80610 | 8331134 | 8332717 | − | R | COG0535 | FeMo cofactor biosynthesis protein                     | <i>nifB</i>  | blr1759 |
| locusA | BJ6T80620 | 8332721 | 8332942 | − |   |         | hypothetical protein                                   |              | bsr1758 |
| locusA | BJ6T80630 | 8333381 | 8333605 | − |   |         | nitrogen fixation protein                              | <i>fixU</i>  | bsr1757 |
| locusA | BJ6T80640 | 8333602 | 8334783 | − | E | COG1104 | nitrogenase metallocusters biosynthesis protein        | <i>nifS</i>  | blr1756 |
| locusA | BJ6T80650 | 8335107 | 8335427 | − | S | COG0316 | R. etli iscN homolog                                   |              | blr1755 |
| locusA | BJ6T80660 | 8335687 | 8336277 | + |   |         | hypothetical protein                                   |              | bl1754  |
| locusA | BJ6T80670 | 8336299 | 8336682 | − | P | COG2146 | hypothetical protein                                   |              | blr1753 |
| locusA | BJ6T80680 | 8337281 | 8338015 | − |   |         | host-inducible protein A homolog                       |              | blr1752 |
| locusA | BJ6T80690 | 8339007 | 8339300 | − | C | COG1145 | ferredoxin                                             | <i>fer3</i>  | bsr1750 |
| locusA | BJ6T80700 | 8339311 | 8339472 | − |   |         | hypothetical protein                                   |              | bsr1749 |
| locusA | BJ6T80710 | 8339525 | 8339989 | − |   |         | hypothetical protein                                   |              | blr1748 |
| locusA | BJ6T80720 | 8339996 | 8340391 | − |   |         | iron-molibdenum cofactor processing protein            | <i>nifX</i>  | blr1747 |
| locusA | BJ6T80730 | 8340388 | 8341797 | − | C | COG2710 | nitrogenase molybdenum-cofactor synthesis protein      | <i>nifN</i>  | blr1746 |
| locusA | BJ6T80740 | 8341807 | 8343450 | − | C | COG2710 | nitrogenase molybdenum-cofactor synthesis protein      | <i>nifE</i>  | blr1745 |
| locusA | BJ6T80750 | 8343543 | 8345099 | − | C | COG2710 | nitrogenase molybdenum-iron protein beta chain         | <i>nifK</i>  | blr1744 |
| locusA | BJ6T80760 | 8345165 | 8346667 | − | C | COG2710 | nitrogenase molybdenum-iron protein alpha chain        | <i>nifD</i>  | blr1743 |
| locusA | BJ6T80770 | 8347266 | 8347571 | + |   |         | putative transposase                                   |              | bl1742  |
| locusA | BJ6T80780 | 8347568 | 8348203 | + | L | COG2801 | putative transposase                                   |              | bl1741  |
| locusA | BJ6T80790 | 8348209 | 8348373 | + |   |         | putative transposase                                   |              |         |
| locusA | BJ6T80800 | 8348479 | 8349426 | − | L | COG3335 | putative transposase                                   |              | blr1740 |
| locusA | BJ6T80810 | 8349687 | 8349881 | − | C | COG1145 | hypothetical protein                                   |              | bsr1739 |
| locusA | BJ6T80820 | 8350419 | 8351531 | − | E | COG0686 | alanine dehydrogenase                                  | <i>aldA</i>  | blr1738 |
| locusA | BJ6T80830 | 8351645 | 8352961 | − | O | COG0309 | hydrogenase expression/formation protein               | <i>hypE</i>  | blr1737 |
| locusA | BJ6T80840 | 8352958 | 8354109 | − | O | COG0409 | hydrogenase expression/formation protein               | <i>hypD</i>  | blr1736 |
| locusA | BJ6T80850 | 8354097 | 8355842 | − | O | COG0068 | hydrogenase maturation protein                         | <i>hypF</i>  | blr1735 |
| locusA | BJ6T80860 | 8356126 | 8356953 | − | L | COG2801 | putative transposase                                   |              |         |
| locusA | BJ6T80870 | 8356950 | 8357255 | − |   |         | putative transposase                                   |              |         |

|        |           |         |         |   |   |         |                                                       |             |         |
|--------|-----------|---------|---------|---|---|---------|-------------------------------------------------------|-------------|---------|
| locusA | BJ6T80880 | 8357293 | 8357595 | – | O | COG0378 | hydrogenase nickel incorporation protein HypB homolog |             | blr1732 |
| locusA | BJ6T80890 | 8357592 | 8357894 | – | O | COG0378 | hydrogenase nickel incorporation protein HypB homolog | <i>hypB</i> | blr1731 |
| locusA | BJ6T80900 | 8358104 | 8358436 | – | R | COG0375 | hydrogenase nickel incorporation protein              | <i>hypA</i> | blr1730 |
| locusA | BJ6T80910 | 8358438 | 8358791 | – |   |         | HupK protein homolog                                  |             | bsr1729 |
| locusA | BJ6T80920 | 8358760 | 8359161 | – |   |         | HupK protein homolog                                  | <i>hupK</i> | blr1728 |
| locusA | BJ6T80930 | 8359627 | 8360178 | – |   |         | HupH protein homolog                                  | <i>hupH</i> | blr1727 |
| locusA | BJ6T80940 | 8360480 | 8360872 | – |   |         | hypothetical protein                                  |             | blr1726 |
| locusA | BJ6T80950 | 8361056 | 8361328 | – | O | COG0298 | HupF protein homolog                                  | <i>hupF</i> | bsr1725 |
| locusA | BJ6T80960 | 8361349 | 8361687 | – | C | COG0680 | HupD protein homolog                                  |             | blr1724 |
| locusA | BJ6T80970 | 8361753 | 8361947 | – | C | COG0680 | hypothetical protein                                  | <i>hupD</i> | bsr1723 |
| locusA | BJ6T80980 | 8361982 | 8362674 | – | C | COG1969 | HupC protein homolog                                  | <i>hupC</i> | blr1722 |
| locusA | BJ6T80990 | 8362679 | 8364469 | – | C | COG0374 | uptake hydrogenase large subunit homolog              | <i>hupL</i> | blr1721 |
| locusA | BJ6T81000 | 8364483 | 8365574 | – | C | COG1740 | uptake hydrogenase small subunit precursor homolog    | <i>hupS</i> | blr1720 |
| locusA | BJ6T81010 | 8366210 | 8366821 | – | P | COG0555 | molybdenum transport system permease protein          | <i>modB</i> | blr1719 |
| locusA | BJ6T81020 | 8367318 | 8367503 |   |   |         | hypothetical protein                                  |             |         |
| locusA | BJ6T81030 | 8367929 | 8369245 | + | C | COG1301 | C4–dicarboxylate transport protein                    | <i>dctA</i> | blI1718 |
| locusA | BJ6T81040 | 8369401 | 8369826 |   |   |         | hypothetical protein                                  |             |         |
| locusA | BJ6T81050 | 8369736 | 8370128 | – | L | COG3293 | putative transposase                                  |             |         |
| locusA | BJ6T81060 | 8370204 | 8371151 | – | L | COG3335 | putative transposase                                  |             |         |
| locusA | BJ6T81070 | 8372414 | 8374816 | + | T | COG0642 | two component regulator                               | <i>nodV</i> | blI1715 |
| locusA | BJ6T81080 | 8374903 | 8375496 | + | T | COG2197 | two component regulator                               | <i>nodW</i> | blI1714 |
| locusA | BJ6T81090 | 8375581 | 8375967 | + | T | COG2197 | two–component response regulator                      |             | bsI1713 |
| locusA | BJ6T81100 | 8376765 | 8378033 | – | L | COG3328 | putative transposase                                  |             |         |
| locusA | BJ6T81110 | 8378163 | 8379368 | + |   |         | putative transposase                                  |             |         |
| locusA | BJ6T81120 | 8379374 | 8380105 | + | L | COG1484 | putative transposase                                  |             |         |
| locusA | BJ6T81130 | 8380114 | 8380692 | – |   |         | hypothetical protein                                  |             | blr1709 |
| locusA | BJ6T81140 | 8381150 | 8384827 | – |   |         | hypothetical protein                                  |             | blr1705 |
| locusA | BJ6T81150 | 8385100 | 8387352 | – |   |         | hypothetical protein                                  |             | blr1704 |
| locusA | BJ6T81160 | 8387523 | 8387834 | – | L | COG3316 | putative transposase                                  |             |         |
| locusA | BJ6T81170 | 8387937 | 8389568 | + | L | COG1961 | hypothetical protein                                  |             | blI1703 |
| locusA | BJ6T81180 | 8389616 | 8390563 | – | L | COG3335 | putative transposase                                  |             |         |
| locusA | BJ6T81190 | 8390948 | 8391952 | + | N | COG3505 | conjugal transfer protein                             | <i>trbG</i> | blI1701 |
| locusA | BJ6T81200 | 8392166 | 8393713 | – | L | COG3436 | putative transposase                                  |             | blr1700 |
| locusA | BJ6T81210 | 8393767 | 8394123 | – | L | COG3436 | hypothetical protein                                  |             |         |
| locusA | BJ6T81220 | 8394674 | 8395018 | + |   |         | hypothetical protein                                  |             |         |
| locusA | BJ6T81230 | 8395543 | 8395764 |   |   |         | hypothetical protein                                  |             |         |
| locusA | BJ6T81240 | 8396334 | 8396591 | + | S | COG3831 | hypothetical protein                                  |             |         |
| locusA | BJ6T81250 | 8397326 | 8398015 | – |   |         | hypothetical protein                                  |             |         |
| locusA | BJ6T81260 | 8399671 | 8402466 | – |   |         | hypothetical protein                                  |             |         |
| locusA | BJ6T81270 | 8402668 | 8403378 | – | L | COG1484 | putative transposase                                  |             |         |
| locusA | BJ6T81280 | 8403384 | 8404742 | – |   |         | putative transposase                                  |             |         |
| locusA | BJ6T81290 | 8404969 | 8405274 | – |   |         | putative transposase                                  |             |         |
| locusA | BJ6T81300 | 8405575 | 8405916 | + |   |         | probable suppressor protein                           |             | blI1688 |
| locusA | BJ6T81310 | 8405913 | 8406416 | + |   |         | hypothetical protein                                  |             | blI1687 |
| locusA | BJ6T81320 | 8406748 | 8406981 |   | M | COG1898 | hypothetical protein                                  |             |         |
| locusA | BJ6T81330 | 8407141 | 8408520 | – | H | COG0161 | putative aminotransferase protein                     |             | blr1686 |
| locusA | BJ6T81340 | 8408846 | 8409034 |   |   |         | hypothetical protein                                  |             |         |
| locusA | BJ6T81350 | 8409299 | 8409754 | – |   |         | putative transposase                                  |             | blI1685 |
| locusA | BJ6T81360 | 8409970 | 8410284 | + |   |         | hypothetical protein                                  |             | blI1684 |
| locusA | BJ6T81370 | 8410281 | 8410571 | – |   |         | hypothetical protein                                  |             | bsr1683 |
| locusA | BJ6T81380 | 8410751 | 8410936 | – | N | COG2948 | probable conjugal transfer protein                    |             |         |
| locusA | BJ6T81390 | 8411044 | 8411496 | – | L | COG3293 | putative transposase                                  |             |         |
| locusA | BJ6T81400 | 8411412 | 8411804 | – | L | COG3293 | putative transposase                                  |             |         |
| locusA | BJ6T81410 | 8411970 | 8412632 | – | E | COG0765 | probable ABC transporter permease protein             |             | blr1680 |
| locusA | BJ6T81420 | 8412629 | 8413144 | – | E | COG0765 | similar to ABC transporter permease protein           |             | blr1679 |
| locusA | BJ6T81430 | 8413253 | 8413444 | + |   |         | hypothetical protein                                  |             | bsI1678 |
| locusA | BJ6T81440 | 8413441 | 8413638 | – |   |         | hypothetical protein                                  |             | bsr1677 |
| locusA | BJ6T81450 | 8413803 | 8415665 | – |   |         | hypothetical protein                                  |             | blr1676 |
| locusA | BJ6T81460 | 8415909 | 8416325 | + | L | COG3316 | putative transposase                                  |             |         |
| locusA | BJ6T81470 | 8416612 | 8417076 | – |   |         | hypothetical protein                                  |             |         |
| locusA | BJ6T81480 | 8417066 | 8417455 | – |   |         | hypothetical protein                                  |             |         |
| locusA | BJ6T81490 | 8417635 | 8418042 |   |   |         | hypothetical protein                                  |             |         |
| locusA | BJ6T81500 | 8419090 | 8419596 | – | Q | COG1020 | probable peptide synthetase                           |             |         |
| locusA | BJ6T81510 | 8419767 | 8420174 | – |   |         | hypothetical protein                                  |             |         |
| locusA | BJ6T81520 | 8420316 | 8421071 | + | L | COG3316 | putative transposase                                  |             | blI1675 |
| locusA | BJ6T81530 | 8421284 | 8421751 | + |   |         | hypothetical protein                                  |             | blI1674 |
| locusA | BJ6T81540 | 8421874 | 8421949 | + |   |         | trnIleCAT                                             |             |         |
| locusA | BJ6T81550 | 8422180 | 8422944 |   | L | COG0084 | hypothetical protein                                  |             |         |
| locusA | BJ6T81560 | 8422941 | 8424215 |   |   |         | hypothetical protein                                  |             |         |
| locusA | BJ6T81570 | 8424212 | 8425093 |   |   |         | hypothetical protein                                  |             |         |
| locusA | BJ6T81580 | 8425074 | 8426972 |   |   |         | hypothetical protein                                  |             |         |
| locusA | BJ6T81590 | 8427163 | 8428128 |   |   |         | hypothetical protein                                  |             |         |
| locusA | BJ6T81600 | 8428167 | 8428925 |   |   |         | hypothetical protein                                  |             |         |
| locusA | BJ6T81610 | 8428962 | 8430167 | – |   |         | hypothetical protein                                  |             | blr1667 |
| locusA | BJ6T81620 | 8430164 | 8431738 | – |   |         | hypothetical protein                                  |             | blr1666 |
| locusA | BJ6T81630 | 8431622 | 8432518 | + |   |         | hypothetical protein                                  |             |         |
| locusA | BJ6T81640 | 8433173 | 8433619 | + |   |         | putative transposase                                  |             | blr1661 |
| locusA | BJ6T81650 | 8433628 | 8434101 | + |   |         | hypothetical protein                                  |             | blI1660 |
| locusA | BJ6T81660 | 8434922 | 8435413 |   |   |         | hypothetical protein                                  |             |         |
| locusA | BJ6T81670 | 8435526 | 8436050 | – | L | COG3547 | putative transposase                                  |             | blr1657 |
| locusA | BJ6T81680 | 8436374 | 8437180 | – |   |         | putative glycosyl hydrolase                           |             | blr1656 |
| locusA | BJ6T81690 | 8437469 | 8438128 | – | L | COG3316 | putative transposase                                  |             | blr1655 |
| locusA | BJ6T81700 | 8438618 | 8438917 | + | S | COG2135 | hypothetical protein                                  |             | bsI1654 |
| locusA | BJ6T81710 | 8438925 | 8439266 | – |   |         | hypothetical protein                                  |             | blr1653 |
| locusA | BJ6T81720 | 8439546 | 8439749 | + |   |         | hypothetical protein                                  |             | bsI1652 |
| locusA | BJ6T81730 | 8439850 | 8440011 | + |   |         | hypothetical protein                                  |             | bsI1651 |
| locusA | BJ6T81740 | 8440464 | 8442002 | – |   |         | hypothetical protein                                  |             | blr1649 |
| locusA | BJ6T81750 | 8442143 | 8442511 | + |   |         | hypothetical protein                                  |             | blI1648 |
| locusA | BJ6T81760 | 8442938 | 8444284 | + |   |         | putative transposase                                  |             | blI1647 |
| locusA | BJ6T81770 | 8444300 | 8444752 | – | L | COG3293 | putative transposase                                  |             | bsr1646 |
| locusA | BJ6T81780 | 8444668 | 8445060 | – | L | COG3293 | putative transposase                                  |             | blr1645 |
| locusA | BJ6T81790 | 8445294 | 8445491 |   |   |         | hypothetical protein                                  |             |         |
| locusA | BJ6T81800 | 8445494 | 8445685 |   |   |         | hypothetical protein                                  |             |         |
| locusA | BJ6T81810 | 8446022 | 8446798 | – | T | COG2200 | hypothetical protein                                  |             | blr1644 |
| locusA | BJ6T81820 | 8447103 | 8447909 | + |   |         | hypothetical protein                                  |             | blI1643 |
| locusA | BJ6T81830 | 8448059 | 8449417 | + |   |         | putative transposase                                  |             | blI1642 |
| locusA | BJ6T81840 | 8449423 | 8450133 | + | L | COG1484 | putative transposase                                  |             | blI1641 |
| locusA | BJ6T81850 | 8450875 | 8451363 | – |   |         | hypothetical protein                                  |             | blr1640 |
| locusA | BJ6T81860 | 8452077 | 8452265 |   |   |         | hypothetical protein                                  |             |         |
| locusA | BJ6T81870 | 8452744 | 8452986 |   |   |         | hypothetical protein                                  |             |         |
| locusA | BJ6T81880 | 8453021 | 8453233 |   |   |         | hypothetical protein                                  |             |         |
| locusA | BJ6T81890 | 8453825 | 8454130 | – |   |         | hypothetical protein                                  |             | blr1638 |
| locusA | BJ6T81900 | 8454182 | 8454481 |   | N | COG3549 | hypothetical protein                                  |             |         |
| locusA | BJ6T81910 | 8454932 | 8455252 | + |   |         | hypothetical protein                                  |             | blI1636 |
| locusA | BJ6T81920 | 8455270 | 8455680 | – |   |         | probable site–specific integrase/recombinase          |             | blr1635 |
| locusA | BJ6T81930 | 8456057 | 8456413 | + |   |         | hypothetical protein                                  |             | blI1634 |
| locusA | BJ6T81940 | 8457034 | 8457474 | – | K | COG1278 | NoeD protein                                          | <i>noeD</i> | blr1633 |
| locusA | BJ6T81950 | 8457807 | 8459633 | – | M | COG0449 | putative glucosamine synthase                         | <i>nodM</i> | blr1632 |
| locusA | BJ6T81960 | 8460967 | 8462052 | + | M | COG1089 | GDP–mannose 4,6–dehydratase                           | <i>noeL</i> | blI1631 |

|        |           |         |         |   |   |         |                                              |             |         |
|--------|-----------|---------|---------|---|---|---------|----------------------------------------------|-------------|---------|
| locusA | BJ6T81970 | 8462024 | 8463031 | + | M | COG0451 | GDP-fucose synthetase                        | <i>nolK</i> | bl1630  |
| locusA | BJ6T81980 | 8463306 | 8466422 | - | Q | COG0841 | multidrug resistance protein                 |             | blr1629 |
| locusA | BJ6T81990 | 8467293 | 8467499 | - |   |         | hypothetical protein                         |             | blr1627 |
| locusA | BJ6T82000 | 8467836 | 8468114 |   |   |         | hypothetical protein                         |             |         |
| locusA | BJ6T82010 | 8468111 | 8468560 |   |   |         | hypothetical protein                         |             |         |
| locusA | BJ6T82020 | 8468789 | 8469358 | - |   |         | hypothetical protein                         |             | blr1625 |
| locusA | BJ6T82030 | 8472204 | 8472527 | + |   |         | hypothetical protein                         |             | bl11623 |
| locusA | BJ6T82040 | 8473428 | 8474630 | - | N | COG2948 | conjugal transfer protein                    | <i>trbI</i> | blr1620 |
| locusA | BJ6T82050 | 8474627 | 8475661 | - | N | COG3504 | conjugal transfer protein                    | <i>trbG</i> | blr1619 |
| locusA | BJ6T82060 | 8475658 | 8476341 | - | N | COG3701 | probable conjugal transfer protein           | <i>trbF</i> | blr1618 |
| locusA | BJ6T82070 | 8476434 | 8477273 | - | N | COG3846 | conjugal transfer protein                    | <i>trbL</i> | blr1617 |
| locusA | BJ6T82080 | 8477381 | 8478721 | - |   |         | hypothetical protein                         |             | blr1616 |
| locusA | BJ6T82090 | 8478869 | 8479603 | - | K | COG1475 | hypothetical protein                         |             | blr1615 |
| locusA | BJ6T82100 | 8479582 | 8480265 | - | K | COG1475 | hypothetical protein                         |             | blr1614 |
| locusA | BJ6T82110 | 8480160 | 8481020 | - | K | COG1475 | hypothetical protein                         |             | blr1613 |
| locusA | BJ6T82120 | 8481126 | 8482088 | - |   |         | antirestriction protein                      | <i>ardC</i> | blr1612 |
| locusA | BJ6T82130 | 8483159 | 8484025 | - | T | COG0642 | hypothetical protein                         |             | blr1611 |
| locusA | BJ6T82140 | 8484009 | 8484845 | - |   |         | hypothetical protein                         |             | blr1610 |
| locusA | BJ6T82150 | 8485493 | 8485729 | - |   |         | hypothetical protein                         |             | bsr1607 |
| locusA | BJ6T82160 | 8486568 | 8486750 |   |   |         | hypothetical protein                         |             |         |
| locusA | BJ6T82170 | 8487039 | 8488766 | - | R | COG1123 | ABC transporter ATP-binding protein          |             | blr1604 |
| locusA | BJ6T82180 | 8488763 | 8489644 | - | E | COG1173 | ABC transporter permease protein             |             | blr1603 |
| locusA | BJ6T82190 | 8489641 | 8490603 | - | E | COG0601 | ABC transporter permease protein             |             | blr1602 |
| locusA | BJ6T82200 | 8490600 | 8492288 | - | E | COG0747 | ABC transporter substrate-binding protein    |             | blr1601 |
| locusA | BJ6T82210 | 8492321 | 8493688 | - | C | COG2141 | nitrilotriacetate monooxygenase              |             | blr1600 |
| locusA | BJ6T82220 | 8494336 | 8494411 | + |   |         | trnIleCAT                                    |             |         |
| locusA | BJ6T82230 | 8494524 | 8495690 |   |   |         | hypothetical protein                         |             |         |
| locusA | BJ6T82240 | 8495909 | 8496199 |   |   |         | hypothetical protein                         |             |         |
| locusA | BJ6T82250 | 8496259 | 8496603 |   |   |         | hypothetical protein                         |             |         |
| locusA | BJ6T82260 | 8496615 | 8496905 |   |   |         | hypothetical protein                         |             |         |
| locusA | BJ6T82270 | 8496915 | 8499569 |   |   |         | hypothetical protein                         |             |         |
| locusA | BJ6T82280 | 8499566 | 8500918 |   |   |         | hypothetical protein                         |             |         |
| locusA | BJ6T82290 | 8501261 | 8501710 |   |   |         | hypothetical protein                         |             |         |
| locusA | BJ6T82300 | 8502251 | 8503012 |   | I | COG1502 | hypothetical protein                         |             |         |
| locusA | BJ6T82310 | 8503009 | 8504859 |   |   |         | hypothetical protein                         |             |         |
| locusA | BJ6T82320 | 8504856 | 8508908 |   |   |         | hypothetical protein                         |             |         |
| locusA | BJ6T82330 | 8510121 | 8514059 |   | L | COG1002 | hypothetical protein                         |             |         |
| locusA | BJ6T82340 | 8514056 | 8517199 |   | K | COG0553 | hypothetical protein                         |             |         |
| locusA | BJ6T82350 | 8517199 | 8518299 |   | L | COG0270 | hypothetical protein                         |             |         |
| locusA | BJ6T82360 | 8519039 | 8519968 |   |   |         | hypothetical protein                         |             |         |
| locusA | BJ6T82370 | 8520006 | 8520440 |   |   |         | hypothetical protein                         |             |         |
| locusA | BJ6T82380 | 8520878 | 8521987 |   |   |         | hypothetical protein                         |             |         |
| locusA | BJ6T82390 | 8522172 | 8523110 |   |   |         | hypothetical protein                         |             |         |
| locusA | BJ6T82400 | 8523119 | 8524294 |   |   |         | hypothetical protein                         |             |         |
| locusA | BJ6T82410 | 8524570 | 8527224 |   |   |         | hypothetical protein                         |             |         |
| locusA | BJ6T82420 | 8527924 | 8531376 |   |   |         | hypothetical protein                         |             |         |
| locusA | BJ6T82430 | 8531918 | 8532148 |   |   |         | hypothetical protein                         |             |         |
| locusA | BJ6T82440 | 8532275 | 8532970 |   | L | COG1961 | hypothetical protein                         |             |         |
| locusA | BJ6T82450 | 8532957 | 8533229 |   |   |         | hypothetical protein                         |             |         |
| locusA | BJ6T82460 | 8533299 | 8533586 |   |   |         | hypothetical protein                         |             |         |
| locusA | BJ6T82470 | 8533583 | 8533966 |   |   |         | hypothetical protein                         |             |         |
| locusA | BJ6T82480 | 8533966 | 8534157 |   |   |         | hypothetical protein                         |             |         |
| locusA | BJ6T82490 | 8535006 | 8535728 |   |   |         | hypothetical protein                         |             |         |
| locusA | BJ6T82500 | 8536224 | 8536742 |   |   |         | hypothetical protein                         |             |         |
| locusA | BJ6T82510 | 8536749 | 8537051 |   |   |         | hypothetical protein                         |             |         |
| locusA | BJ6T82520 | 8537557 | 8537943 |   |   |         | hypothetical protein                         |             |         |
| locusA | BJ6T82530 | 8538185 | 8539384 |   | L | COG0582 | probable site-specific integrase/recombinase |             |         |
| locusA | BJ6T82540 | 8540407 | 8542119 | + |   |         | hypothetical protein                         |             | bl11595 |
| locusA | BJ6T82550 | 8542116 | 8542685 | + |   |         | hypothetical protein                         |             | bl11594 |
| locusA | BJ6T82560 | 8542686 | 8545118 | + |   |         | hypothetical protein                         |             | bl11593 |
| locusA | BJ6T82570 | 8546063 | 8547157 | + |   |         | hypothetical protein                         |             | bl11592 |
| locusA | BJ6T82580 | 8547230 | 8547829 | + |   |         | hypothetical protein                         |             | bl11591 |
| locusA | BJ6T82590 | 8548118 | 8548561 | - |   |         | hypothetical protein                         |             | bsr1590 |
| locusA | BJ6T82600 | 8548660 | 8548896 | + | K | COG1396 | hypothetical protein                         |             | bsl1589 |
| locusA | BJ6T82610 | 8548883 | 8549854 | - | S | COG1273 | conserved hypothetical protein               |             | blr1588 |
| locusA | BJ6T82620 | 8550005 | 8550382 | + |   |         | hypothetical protein                         |             | bl11587 |
| locusA | BJ6T82630 | 8550944 | 8551309 | - |   |         | putative excisionase                         |             | bl11586 |
| locusA | BJ6T82650 | 8551520 | 8552374 | + | L | COG0582 | probable site-specific integrase/recombinase |             | bl11584 |
| locusA | BJ6T82660 | 8552885 | 8554618 | + | R | COG0666 | hypothetical protein                         |             | bl11583 |
| locusA | BJ6T82670 | 8554615 | 8555418 | + |   |         | hypothetical protein                         |             | bl11582 |
| locusA | BJ6T82680 | 8555430 | 8556551 | + |   |         | hypothetical protein                         |             | bl11581 |
| locusA | BJ6T82690 | 8556842 | 8557447 | + |   |         | hypothetical protein                         |             | bl11580 |
| locusA | BJ6T82700 | 8557613 | 8557960 | - | R | COG0637 | hypothetical protein                         |             | blr1579 |
| locusA | BJ6T82710 | 8558001 | 8558390 | - | L | COG3436 | hypothetical protein                         |             | blr1578 |
| locusA | BJ6T82720 | 8558532 | 8558738 |   |   |         | hypothetical protein                         |             |         |
| locusA | BJ6T82730 | 8558914 | 8559078 | - | L | COG3436 | hypothetical protein                         |             | bl11576 |
| locusA | BJ6T82740 | 8559106 | 8559492 | - | L | COG3436 | hypothetical protein                         |             | blr1575 |
| locusA | BJ6T82750 | 8559719 | 8559970 | - | L | COG3436 | putative transposase                         |             | bsr1574 |
| locusA | BJ6T82760 | 8559967 | 8560398 | - |   |         | hypothetical protein                         |             | blr1573 |
| locusA | BJ6T82770 | 8560632 | 8562089 | + |   |         | hypothetical protein                         |             | bl11572 |
| locusA | BJ6T82780 | 8562000 | 8563256 | - |   |         | hypothetical protein                         |             | blr1571 |
| locusA | BJ6T82790 | 8563268 | 8563837 | - |   |         | hypothetical protein                         |             | blr1571 |
| locusA | BJ6T82800 | 8563986 | 8576291 | + |   |         | hypothetical protein                         |             | bl11570 |
| locusA | BJ6T82810 | 8576294 | 8584426 | + |   |         | hypothetical protein                         |             | bl11569 |
| locusA | BJ6T82820 | 8584545 | 8585156 | + |   |         | hypothetical protein                         |             | bl11568 |
| locusA | BJ6T82830 | 8585611 | 8586063 | + |   |         | hypothetical protein                         |             | bl11567 |
| locusA | BJ6T82840 | 8586282 | 8587391 | + |   |         | hypothetical protein                         |             | bl11566 |
| locusA | BJ6T82850 | 8587602 | 8590430 | - |   |         | hypothetical protein                         |             | blr1564 |
| locusA | BJ6T82860 | 8590440 | 8590754 | - |   |         | hypothetical protein                         |             | blr1563 |
| locusA | BJ6T82870 | 8591594 | 8591782 | - |   |         | hypothetical protein                         |             | bsr1562 |
| locusA | BJ6T82880 | 8591769 | 8591993 | - |   |         | hypothetical protein                         |             | bsr1561 |
| locusA | BJ6T82890 | 8592468 | 8592662 | + |   |         | hypothetical protein                         |             | bl11560 |
| locusA | BJ6T82900 | 8593273 | 8593572 |   |   |         | hypothetical protein                         |             |         |
| locusA | BJ6T82910 | 8593676 | 8594068 | + |   |         | hypothetical protein                         |             | bl11558 |
| locusA | BJ6T82920 | 8594412 | 8594903 | + |   |         | hypothetical protein                         |             | bl11557 |
| locusA | BJ6T82930 | 8595110 | 8595946 | - | T | COG0664 | hypothetical protein                         |             | blr1556 |
| locusA | BJ6T82940 | 8596611 | 8596970 | + | C | COG3794 | hypothetical protein                         |             | bl11555 |
| locusA | BJ6T82950 | 8596975 | 8597967 | - |   |         | hypothetical protein                         |             | blr1554 |
| locusA | BJ6T82960 | 8598475 | 8599497 | - | P | COG1858 | methylamine utilization protein precursor    | <i>mauG</i> | blr1552 |
| locusA | BJ6T82970 | 8599886 | 8600785 | - | T | COG2200 | hypothetical protein                         |             | blr1551 |
| locusA | BJ6T82980 | 8600936 | 8601160 |   |   |         | hypothetical protein                         |             |         |
| locusA | BJ6T82990 | 8601281 | 8601553 |   |   |         | hypothetical protein                         |             |         |
| locusA | BJ6T83000 | 8601607 | 8602593 | - | N | COG0840 | hypothetical protein                         |             | blr1551 |
| locusA | BJ6T83010 | 8603386 | 8604159 |   | L | COG3293 | hypothetical protein                         |             |         |
| locusA | BJ6T83020 | 8605821 | 8606144 |   |   |         | hypothetical protein                         |             |         |
| locusA | BJ6T83030 | 8606828 | 8607268 |   |   |         | hypothetical protein                         |             |         |
| locusA | BJ6T83040 | 8607675 | 8607908 | - |   |         | hypothetical protein                         |             | bsr1547 |
| locusA | BJ6T83050 | 8608384 | 8608587 |   |   |         | hypothetical protein                         |             |         |
| locusA | BJ6T83060 | 8608723 | 8609121 | - |   |         | hypothetical protein                         |             | blr1546 |

|        |           |         |         |   |   |         |                                                          |                     |
|--------|-----------|---------|---------|---|---|---------|----------------------------------------------------------|---------------------|
| locusA | BJ6T83070 | 8609003 | 8609395 | + | L | COG3293 | putative transposase                                     |                     |
| locusA | BJ6T83080 | 8609491 | 8609763 | + | L | COG3293 | putative transposase                                     |                     |
| locusA | BJ6T83090 | 8610188 | 8610601 | + |   |         | hypothetical protein                                     | blI1544             |
| locusA | BJ6T83100 | 8610615 | 8610929 |   |   |         | hypothetical protein                                     |                     |
| locusA | BJ6T83110 | 8611885 | 8612154 | + |   |         | hypothetical protein                                     | blI1541             |
| locusA | BJ6T83120 | 8612359 | 8614416 | + | R | COG0824 | hypothetical protein                                     | blI1540             |
| locusC | BJ6T87770 | 9113996 | 9115237 | + | L | COG0582 | probable site-specific integrase/recombinase             | blr8174             |
| locusC | BJ6T87780 | 9115234 | 9116577 | + |   |         | hypothetical protein                                     | blr8175             |
| locusC | BJ6T87790 | 9116579 | 9117832 | + |   |         | hypothetical protein                                     | blr8176             |
| locusC | BJ6T87800 | 9117923 | 9120412 | − |   |         | hypothetical protein                                     | blI8177             |
| locusC | BJ6T87810 | 9120409 | 9120633 |   |   |         | hypothetical protein                                     |                     |
| locusC | BJ6T87820 | 9120723 | 9121499 | − |   |         | hypothetical protein                                     |                     |
| locusC | BJ6T87830 | 9121686 | 9122240 |   |   |         | hypothetical protein                                     | blI8178             |
| locusC | BJ6T87840 | 9122359 | 9124146 | + |   |         | hypothetical protein                                     |                     |
| locusC | BJ6T87850 | 9124187 | 9125296 | + | L | COG3335 | putative transposase                                     | blr8180             |
| locusC | BJ6T87860 | 9125307 | 9126071 | − | L | COG3293 | putative transposase                                     | blr8181             |
| locusC | BJ6T87870 | 9126630 | 9127694 | − | L | COG3547 | putative transposase                                     | blI8182             |
| locusC | BJ6T87880 | 9127952 | 9128536 | − |   |         | hypothetical protein                                     | blI8183             |
| locusC | BJ6T87890 | 9128783 | 9129151 | + | K | COG1309 | transcriptional regulatory protein TetR family           | blI8184             |
| locusC | BJ6T87900 | 9129127 | 9129408 | + |   |         | transcriptional regulatory protein TetR family           | blr8185             |
| locusC | BJ6T87910 | 9129568 | 9130215 | + | S | COG1376 | hypothetical protein                                     | blr8186             |
| locusC | BJ6T87920 | 9130320 | 9131198 | + | Q | COG1028 | dehydrogenase                                            | blr8187             |
| locusC | BJ6T87930 | 9131195 | 9132043 | + | R | COG0596 | putative dehalogenase                                    | blr8188             |
| locusC | BJ6T87940 | 9132056 | 9132679 | + | E | COG0346 | hypothetical protein                                     | blr8189             |
| locusC | BJ6T87950 | 9132952 | 9133251 | + |   |         | hypothetical protein                                     | blr8190             |
| locusC | BJ6T87960 | 9133715 | 9134068 |   |   |         | hypothetical protein                                     |                     |
| locusC | BJ6T87970 | 9134131 | 9135036 | − |   |         | putative transposase                                     |                     |
| locusC | BJ6T87980 | 9135702 | 9135986 | − | K | COG1396 | probable transcriptional regulator                       | blI8192             |
| locusC | BJ6T87990 | 9136311 | 9136640 |   |   |         | hypothetical protein                                     |                     |
| locusC | BJ6T88000 | 9136660 | 9137544 |   |   |         | hypothetical protein                                     |                     |
| locusC | BJ6T88010 | 9138011 | 9138676 |   |   |         | hypothetical protein                                     |                     |
| locusC | BJ6T88020 | 9138673 | 9138990 |   |   |         | hypothetical protein                                     |                     |
| locusC | BJ6T88030 | 9138980 | 9139720 |   |   |         | hypothetical protein                                     |                     |
| locusC | BJ6T88040 | 9139764 | 9140726 |   |   |         | hypothetical protein                                     |                     |
| locusC | BJ6T88050 | 9141059 | 9141235 |   |   |         | hypothetical protein                                     |                     |
| locusC | BJ6T88060 | 9141814 | 9142680 | + | L | COG0582 | probable site-specific integrase/recombinase             | blr8193             |
| locusC | BJ6T88070 | 9142373 | 9143098 | + | L | COG3436 | putative transposase                                     | blr8194             |
| locusC | BJ6T88080 | 9143335 | 9144663 | − | L | COG3344 | probable group II intron, maturase/reverse transcriptase | blI8195             |
| locusC | BJ6T88090 | 9144599 | 9145435 | − |   |         | putative outer-membrane immunogenic protein precursor    | blI8196             |
| locusC | BJ6T88100 | 9145879 | 9146547 | + | D | COG1192 | probable partition protein                               | blr8197             |
| locusC | BJ6T88110 | 9146735 | 9147547 | + |   |         | hypothetical protein                                     | blr8198             |
| locusC | BJ6T88120 | 9147552 | 9148415 | − | L | COG1484 | putative transposase                                     | blI8199             |
| locusC | BJ6T88130 | 9148415 | 9148969 | − |   |         | putative transposase                                     | blI8200             |
| locusC | BJ6T88140 | 9149185 | 9150696 | − |   |         | putative transposase                                     |                     |
| locusC | BJ6T88150 | 9151885 | 9152712 | − | L | COG2801 | putative transposase                                     | blr8261             |
| locusC | BJ6T88160 | 9152709 | 9153014 | − |   |         | putative transposase                                     | blr8260             |
| locusC | BJ6T88170 | 9153178 | 9153558 | + |   |         | hypothetical protein                                     | blI8259             |
| locusC | BJ6T88180 | 9153515 | 9153907 | + |   |         | hypothetical protein                                     | blI8258             |
| locusC | BJ6T88190 | 9153922 | 9155349 | + | R | COG3378 | hypothetical protein                                     | blI8257             |
| locusC | BJ6T88200 | 9155750 | 9156301 | + |   |         | hypothetical protein                                     | blI8256             |
| locusC | BJ6T88210 | 9156499 | 9157032 | + |   |         | hypothetical protein                                     | blI8255             |
| locusC | BJ6T88220 | 9157032 | 9157676 |   |   |         | hypothetical protein                                     |                     |
| locusC | BJ6T88230 | 9157785 | 9158063 | + | R | COG3740 | hypothetical protein                                     | bsI8253             |
| locusC | BJ6T88240 | 9158066 | 9158275 | + |   |         | hypothetical protein                                     | bsI8252             |
| locusC | BJ6T88250 | 9158375 | 9158740 | + |   |         | hypothetical protein                                     | blI8251             |
| locusC | BJ6T88260 | 9158877 | 9160307 | + |   |         | hypothetical protein                                     | blI8250             |
| locusC | BJ6T88270 | 9160324 | 9160527 | + | K | COG1278 | cold shock protein                                       | <i>cspA</i> bsl8249 |
| locusC | BJ6T88280 | 9160913 | 9161143 |   |   |         | hypothetical protein                                     |                     |
| locusC | BJ6T88290 | 9162447 | 9162764 | + |   |         | hypothetical protein                                     | blI8248             |
| locusC | BJ6T88300 | 9162790 | 9163074 | − |   |         | hypothetical protein                                     | bsr8247             |
| locusC | BJ6T88310 | 9163382 | 9163660 |   |   |         | hypothetical protein                                     |                     |
| locusC | BJ6T88320 | 9163979 | 9164221 |   |   |         | hypothetical protein                                     |                     |
| locusC | BJ6T88330 | 9164225 | 9164461 |   |   |         | hypothetical protein                                     |                     |
| locusC | BJ6T88340 | 9164461 | 9164703 | − |   |         | hypothetical protein                                     |                     |
| locusC | BJ6T88350 | 9165119 | 9165376 |   |   |         | hypothetical protein                                     | bsr8246             |
| locusC | BJ6T88360 | 9166024 | 9170349 | + |   |         | hypothetical protein                                     |                     |
| locusC | BJ6T88370 | 9171084 | 9171341 | − | S | COG3831 | hypothetical protein                                     | blI8244             |
| locusC | BJ6T88380 | 9171940 | 9172389 | + | L | COG3293 | putative transposase                                     | bsr8241             |
| locusC | BJ6T88390 | 9172746 | 9172967 |   |   |         | hypothetical protein                                     |                     |
| locusC | BJ6T88400 | 9173492 | 9173836 | − |   |         | hypothetical protein                                     |                     |
| locusC | BJ6T88410 | 9174112 | 9174390 | + | L | COG2963 | hypothetical protein                                     | blr8240             |
| locusC | BJ6T88420 | 9174387 | 9174743 | + | L | COG3436 | hypothetical protein                                     | blI8239             |
| locusC | BJ6T88430 | 9174797 | 9175069 | + |   |         | hypothetical protein                                     | blI8238             |
| locusC | BJ6T88440 | 9175148 | 9175975 | − | L | COG2801 | putative transposase                                     | blI8237             |
| locusC | BJ6T88450 | 9175972 | 9176277 | − |   |         | putative transposase                                     |                     |
| locusC | BJ6T88460 | 9176477 | 9176854 | − | L | COG1425 | hypothetical protein                                     | blr8234             |
| locusC | BJ6T88470 | 9177303 | 9177560 | − | L | COG2963 | putative transposase                                     | blr8233             |
| locusC | BJ6T88480 | 9177579 | 9177746 | − |   |         | putative transposase                                     | blr8233             |
| locusC | BJ6T88490 | 9179008 | 9180114 | + | E | COG1509 | hypothetical protein                                     | blI8232             |
| locusC | BJ6T88500 | 9180122 | 9181744 | + | E | COG0405 | putative gamma-glutamyltranspeptidase                    | blI8231             |
| locusC | BJ6T88510 | 9181741 | 9182604 | + |   |         | hypothetical protein                                     | blI8230             |
| locusC | BJ6T88520 | 9182595 | 9183641 | + | M | COG1181 | hypothetical protein                                     | blI8229             |
| locusC | BJ6T88530 | 9183853 | 9184032 | + |   |         | hypothetical protein                                     | bsI8228             |
| locusC | BJ6T88540 | 9184193 | 9184468 | + |   |         | hypothetical protein                                     | blI8227             |
| locusC | BJ6T88550 | 9184665 | 9184931 |   |   |         | hypothetical protein                                     |                     |
| locusC | BJ6T88560 | 9185123 | 9185452 | − |   |         | hypothetical protein                                     | blr8224             |
| locusC | BJ6T88570 | 9185788 | 9186111 | + |   |         | hypothetical protein                                     | blI8223             |
| locusC | BJ6T88580 | 9186223 | 9186624 | − | L | COG1425 | putative transposase                                     | blr8222             |
| locusC | BJ6T88590 | 9186802 | 9187029 | − | L | COG2801 | putative transposase                                     | bsr8221             |
| locusC | BJ6T88600 | 9187152 | 9187913 | − | L | COG1484 | putative transposase                                     | blr8220             |
| locusC | BJ6T88610 | 9187932 | 9189473 | − |   |         | putative transposase                                     | blr8219             |
| locusC | BJ6T88620 | 9189579 | 9189881 | − | L | COG2801 | putative transposase                                     | blr8218             |
| locusC | BJ6T88630 | 9189602 | 9190228 | − | L | COG2801 | hypothetical protein                                     | blr8217             |
| locusC | BJ6T88640 | 9190225 | 9190530 | − |   |         | putative transposase                                     | blr8216             |
| locusC | BJ6T88650 | 9190585 | 9190950 | − | L | COG1425 | putative transposase                                     | blr8215             |
| locusC | BJ6T88660 | 9190996 | 9191256 | − | L | COG2963 | putative transposase                                     | bsr8214             |
| locusC | BJ6T88670 | 9191469 | 9191681 | + | C | COG1012 | hypothetical protein                                     | bsr8213             |
| locusC | BJ6T88680 | 9191927 | 9193060 | + | H | COG0654 | putative monooxygenase                                   | blI8212             |
| locusC | BJ6T88690 | 9193406 | 9193630 | + | L | COG3316 | hypothetical protein                                     | bsI8210             |
| locusC | BJ6T88700 | 9193492 | 9194109 | + | L | COG3316 | hypothetical protein                                     | blI8209             |
| locusC | BJ6T88710 | 9194033 | 9194227 | + | I | COG2084 | hypothetical protein                                     | bsI8208             |
| locusC | BJ6T88720 | 9194197 | 9194526 | + |   |         | hypothetical protein                                     | blI8207             |
| locusC | BJ6T88730 | 9194533 | 9195093 | + | L | COG3344 | probable maturase; reverse transcriptase                 | blI8206             |
| locusC | BJ6T88740 | 9195020 | 9195292 | + | L | COG3344 | probable reverse transcriptase/maturase family protein   |                     |
| locusC | BJ6T88750 | 9195424 | 9196011 | + |   |         | probable maturase; reverse transcriptase                 | blI8205             |
| locusC | BJ6T88760 | 9196110 | 9196565 | − |   |         | hypothetical protein                                     | blr8204             |
| locusC | BJ6T88770 | 9196738 | 9197142 | + |   |         | hypothetical protein                                     | blI8203             |
| locusC | BJ6T88780 | 9197378 | 9197644 | + |   |         | hypothetical protein                                     | blI8202             |

|        |           |         |         |   |   |         |                                                           |             |         |
|--------|-----------|---------|---------|---|---|---------|-----------------------------------------------------------|-------------|---------|
| locusC | BJ6T88790 | 9198617 | 9199156 | + |   |         | hypothetical protein                                      |             | blI8201 |
| locusC | BJ6T88800 | 9199454 | 9200458 | + |   |         | putative transposase                                      |             | blI8200 |
| locusC | BJ6T88810 | 9200528 | 9201760 | − |   |         | putative transposase                                      |             |         |
| locusC | BJ6T88820 | 9202391 | 9202693 |   |   |         | hypothetical protein                                      |             |         |
| locusC | BJ6T88830 | 9203199 | 9203465 |   |   |         | hypothetical protein                                      |             |         |
| locusC | BJ6T88840 | 9203923 | 9204240 |   |   |         | hypothetical protein                                      |             |         |
| locusC | BJ6T88850 | 9204343 | 9204639 | − |   |         | hypothetical protein                                      |             | bsI8315 |
| locusC | BJ6T88860 | 9204953 | 9205195 | + |   |         | hypothetical protein                                      |             |         |
| locusC | BJ6T88870 | 9205374 | 9205688 | + | L | COG2801 | hypothetical protein                                      |             | bsr8316 |
| locusC | BJ6T88880 | 9206723 | 9206893 |   |   |         | hypothetical protein                                      |             |         |
| locusC | BJ6T00010 | 123     | 428     | + |   |         | hypothetical protein                                      |             | blr0001 |
| locusC | BJ6T00020 | 484     | 1023    | + |   |         | hypothetical protein                                      |             | blr0002 |
| locusC | BJ6T00030 | 1544    | 1795    |   |   |         | hypothetical protein                                      |             |         |
| locusC | BJ6T00040 | 2945    | 3193    | + |   |         | hypothetical protein                                      |             | blr0003 |
| locusC | BJ6T00050 | 3160    | 3681    | + |   |         | hypothetical protein                                      |             | blr0003 |
| locusC | BJ6T00060 | 4425    | 4682    | − |   |         | hypothetical protein                                      |             | blI0005 |
| locusC | BJ6T00070 | 4970    | 6043    | − | F | COG0208 | ribonucleoside–diphosphate reductase beta subunit         | <i>nrdB</i> | blI0006 |
| locusC | BJ6T00080 | 6034    | 7977    | − | F | COG0209 | probable ribonucleoside–diphosphate reductase             |             | blI0007 |
| locusC | BJ6T00090 | 8414    | 8668    |   |   |         | hypothetical protein                                      |             |         |
| locusC | BJ6T00100 | 8959    | 9465    | − | K | COG0454 | putative acetyltransferase                                |             | blI0009 |
| locusC | BJ6T00110 | 10342   | 10740   | − |   |         | hypothetical protein                                      |             | blI0010 |
| locusC | BJ6T00120 | 10901   | 11086   |   |   |         | hypothetical protein                                      |             |         |
| locusC | BJ6T00130 | 11785   | 12156   | + | L | COG1961 | hypothetical protein                                      |             | blr0012 |
| locusC | BJ6T00140 | 12278   | 12811   | + | L | COG1961 | putative transposase                                      |             | blr0013 |
| locusC | BJ6T00150 | 12768   | 12923   |   |   |         | hypothetical protein                                      |             |         |
| locusC | BJ6T00160 | 13094   | 13417   |   |   |         | hypothetical protein                                      |             |         |
| locusC | BJ6T00170 | 13676   | 14065   | − |   |         | putative transposase                                      |             | blI0015 |
| locusC | BJ6T00180 | 14062   | 14373   | − |   |         | hypothetical protein                                      |             | bsI0016 |
| locusC | BJ6T00190 | 14735   | 15040   | + |   |         | putative transposase                                      |             | blI0017 |
| locusC | BJ6T00200 | 15037   | 15864   | + | L | COG2801 | putative transposase                                      |             | blI0018 |
| locusC | BJ6T00210 | 16185   | 16514   | + |   |         | hypothetical protein                                      |             | blI0019 |
| locusC | BJ6T00220 | 17135   | 18367   | − | Q | COG2124 | hypothetical protein                                      |             | blI0020 |
| locusC | BJ6T00230 | 18493   | 20091   | − |   |         | hypothetical protein                                      |             | blI0021 |
| locusC | BJ6T00240 | 21521   | 21811   | + |   |         | hypothetical protein                                      |             | bsr0022 |
| locusC | BJ6T00250 | 22133   | 23077   | + | L | COG3335 | putative transposase                                      |             | blr0023 |
| locusC | BJ6T00260 | 23738   | 23980   | − | L | COG1484 | hypothetical protein                                      |             | blr0024 |
| locusC | BJ6T00270 | 24722   | 26236   | − |   |         | 67 kDa Myosin–crossreactive streptococcal antigen homolog |             | blI0025 |
| locusC | BJ6T00280 | 26254   | 26481   | − |   |         | 67 kDa Myosin–crossreactive streptococcal antigen homolog |             | blI0025 |
| locusC | BJ6T00290 | 26527   | 27285   | − | Q | COG1028 | probable dehydrogenase                                    |             | blI0026 |
| locusC | BJ6T00300 | 27735   | 27953   | + |   |         | hypothetical protein                                      |             | bsr0027 |
| locusC | BJ6T00310 | 28522   | 29310   | + |   |         | hypothetical protein                                      |             | blr0028 |
| locusC | BJ6T00320 | 29407   | 29694   | + |   |         | hypothetical protein                                      |             | bsr0029 |
| locusC | BJ6T00330 | 29787   | 31367   | + | L | COG1961 | recombinase                                               |             | blr0030 |
| locusC | BJ6T00340 | 31432   | 31671   | + |   |         | hypothetical protein                                      |             | blI0031 |
| locusC | BJ6T00350 | 31754   | 31939   | − |   |         | hypothetical protein                                      |             | bsI0032 |
| locusC | BJ6T00360 | 32234   | 32467   | + | G | COG0726 | hypothetical protein                                      |             | bsr0033 |
| locusC | BJ6T00370 | 32880   | 33305   | + | L | COG2963 | putative transposase                                      |             | blr0034 |
| locusC | BJ6T00380 | 33302   | 33658   | + | L | COG3436 | hypothetical protein                                      |             | blr0035 |
| locusC | BJ6T00390 | 33645   | 33947   | + | E | COG0834 | hypothetical protein                                      |             | bsr0036 |
| locusC | BJ6T00400 | 33960   | 34316   | + | E | COG0765 | hypothetical protein                                      |             | blr0037 |
| locusC | BJ6T00410 | 34574   | 34855   | + | K | COG1396 | probable transcriptional regulator                        |             | bsr0038 |
| locusC | BJ6T00420 | 35822   | 36217   | − | S | COG3791 | hypothetical protein                                      |             | blI0040 |
| locusC | BJ6T00430 | 36852   | 37238   | − |   |         | hypothetical protein                                      |             | blI0042 |
| locusC | BJ6T00440 | 37299   | 39281   | − | N | COG3505 | conjugal transfer protein                                 | <i>traG</i> | blI0043 |
| locusC | BJ6T00450 | 39323   | 40498   | − | N | COG3843 | hypothetical protein                                      |             | blI0044 |
| locusC | BJ6T00460 | 41530   | 42072   | − | M | COG0741 | probable transglycosylase                                 |             | blI0045 |
| locusC | BJ6T00470 | 42442   | 42777   | − |   |         | hypothetical protein                                      |             | blI0046 |
| locusC | BJ6T00480 | 42812   | 43357   | − | N | COG0681 | conjugal transfer protein precursor                       | <i>traF</i> | blI0047 |
| locusC | BJ6T00490 | 43354   | 43872   | − |   |         | hypothetical protein                                      |             | blI0048 |
| locusC | BJ6T00500 | 43859   | 44125   | − |   |         | hypothetical protein                                      |             | bsI0049 |
| locusC | BJ6T00510 | 44122   | 44760   | − | D | COG1192 | putative partition protein                                |             | blI0050 |
| locusC | BJ6T00520 | 44757   | 45872   | − |   |         | replication protein A                                     | <i>repA</i> | blI0051 |
| locusC | BJ6T00530 | 45886   | 46137   | − |   |         | hypothetical protein                                      |             | blI0052 |
| locusC | BJ6T00540 | 46341   | 46856   | − |   |         | hypothetical protein                                      |             | blI0053 |
| locusC | BJ6T00550 | 46918   | 47127   |   |   |         | hypothetical protein                                      |             |         |
| locusC | BJ6T00560 | 47247   | 47510   | − |   |         | hypothetical protein                                      |             | bsI0054 |
| locusC | BJ6T00570 | 47760   | 47975   | + | K | COG1396 | probable transcriptional regulator                        |             | bsr0055 |
| locusC | BJ6T00580 | 48139   | 48549   | + |   |         | hypothetical protein                                      |             | blr0056 |
| locusC | BJ6T00590 | 48666   | 48992   | − |   |         | hypothetical protein                                      |             | blI0057 |
| locusC | BJ6T00600 | 49041   | 49340   | + |   |         | hypothetical protein                                      |             |         |
| locusC | BJ6T00610 | 49700   | 50041   | + |   |         | hypothetical protein                                      |             | blr0058 |
| locusC | BJ6T00620 | 50073   | 50279   | − | K | COG1278 | cold shock protein                                        | <i>cspA</i> | bsI0059 |
| locusC | BJ6T00630 | 50714   | 51487   | + | Q | COG0500 | hypothetical protein                                      |             | blr0060 |
| locusC | BJ6T00640 | 51536   | 51958   | − |   |         | hypothetical protein                                      |             | blI0061 |
| locusC | BJ6T00650 | 52254   | 52922   | + |   |         | Atc1 protein                                              | <i>atc1</i> | blr0062 |
| locusC | BJ6T00660 | 52998   | 53927   | − |   |         | hypothetical protein                                      |             | blI0063 |
| locusC | BJ6T00670 | 54254   | 55306   | − |   |         | hypothetical protein                                      |             | blI0064 |
| locusC | BJ6T00680 | 55369   | 57462   | − | K | COG1475 | putative DNA–binding protein                              |             | blI0065 |
| locusC | BJ6T00690 | 57635   | 58813   | − |   |         | hypothetical protein                                      |             | blI0066 |
| locusC | BJ6T00700 | 59388   | 59606   |   |   |         | hypothetical protein                                      |             |         |
| locusC | BJ6T00710 | 59734   | 59949   | + |   |         | hypothetical protein                                      |             | bsr0067 |
| locusC | BJ6T00720 | 60216   | 61622   | − | L | COG2925 | exonuclease I                                             |             | blI0068 |
| locusC | BJ6T00730 | 61630   | 61998   | − |   |         | hypothetical protein                                      |             | blI0069 |
| locusC | BJ6T00740 | 62148   | 62543   | − |   |         | hypothetical protein                                      |             | blI0070 |
| locusC | BJ6T00750 | 62678   | 62899   | + |   |         | hypothetical protein                                      |             | bsr0071 |
| locusC | BJ6T00760 | 62975   | 64225   | + |   |         | hypothetical protein                                      |             | blr0072 |
| locusC | BJ6T00770 | 64226   | 64681   | + |   |         | hypothetical protein                                      |             | blr0073 |
| locusC | BJ6T00780 | 64674   | 65801   | + |   |         | hypothetical protein                                      |             | blr0074 |
| locusC | BJ6T00790 | 66164   | 66718   | − |   |         | hypothetical protein                                      |             | blI0075 |
| locusC | BJ6T00800 | 66834   | 67748   | − |   |         | hypothetical protein                                      |             | blI0076 |
| locusC | BJ6T00810 | 69844   | 70356   | + |   |         | hypothetical protein                                      |             | blr0077 |
